# Graphene nanoflakes for acute manipulation of membrane cholesterol and transmembrane signaling

AUTHOR NAMES:

*Kristina E. Kitko<sup>1,2</sup>†, Tu Hong<sup>3</sup>†, Roman M. Lazarenko<sup>1</sup>†, J. Rafael Montenegro-Burke<sup>4,5</sup>, Amy T. Shah<sup>6</sup>, Yuchen Zhang<sup>3</sup>, Krishnan Raghunathan<sup>7</sup>, Anne K. Kenworthy<sup>7,8</sup>, Melissa C. Skala<sup>6,9</sup>, John A. McLean<sup>4,5</sup>, Ya-Qiong Xu<sup>2,3,10</sup>\*, Qi Zhang<sup>1,2</sup>\**

AUTHOR ADDRESS.

<sup>1</sup> Department of Pharmacology, Vanderbilt University, Nashville, Tennessee 37232, USA.

<sup>2</sup> Program in Interdisciplinary Materials Science, Vanderbilt University, Nashville, Tennessee 37235, USA.

<sup>3</sup> Department of Electrical Engineering and Computer Science, Vanderbilt University, Nashville, Tennessee 37235, USA.

<sup>4</sup> Department of Chemistry, Vanderbilt University, Nashville, Tennessee 37235, USA.

<sup>5</sup> Center for Innovative Technology, Vanderbilt University, Nashville, Tennessee 37235, USA.

<sup>6</sup> Department of Biomedical Engineering, Vanderbilt University, Nashville, Tennessee 37235, USA.

<sup>7</sup> Department of Molecular Physiology and Biophysics, Vanderbilt University, Nashville, Tennessee 37232, USA.

<sup>8</sup> Department of Cell and Developmental Biology, Vanderbilt University, Nashville, Tennessee 37235, USA.

<sup>9</sup> Department of Cancer Biology, Vanderbilt University, Nashville, Tennessee 37232, USA.

<sup>10</sup> Department of Physics and Astronomy, Vanderbilt University, Nashville, Tennessee 37235, USA.

†These authors contributed equally to this work

## KEYWORDS:

Graphene, cholesterol, cell membrane, receptor, exocytosis, synapse

## ABSTRACT:

Cholesterol is one of the most essential lipids in eukaryotic cell membranes. However, acute and selective manipulation of membrane cholesterol remains challenging. Here, we report that graphene nanoflakes (GNFs) insert into the plasma membrane and directly interact with cholesterol, resulting in acute cholesterol enrichment - and thus structural and functional changes. Using two representative cell preparations, we explore the utility of GNFs in modifying cell communication pathways sensitive to membrane cholesterol. In fibroblasts, GNFs enhance ATP-induced intracellular  $\text{Ca}^{2+}$ -release by allosteric facilitation of P2Y receptors, a subtype of G protein-coupled receptors, in a cholesterol-dependent manner. In neurons, which possess higher membrane cholesterol levels than most cell types, GNFs further increase cholesterol. Consequently, GNFs change membrane fluidity, especially at synaptic boutons, and potentiate neurotransmitter release by accelerating synaptic vesicle turnover. Together, our results provide a molecular explanation for graphene's cellular impacts and demonstrate its potential for membrane-oriented engineering of cell signaling.

## 1 **Introduction**

2 In most eukaryotic cells, the plasma membrane is the largest structure and the only interface  
3 between the intracellular and extracellular environments. Most intercellular communications are  
4 transduced through the plasma membrane via integral proteins or the release and uptake of  
5 signaling molecules. Therefore, transmembrane proteins, like receptors and ion channels, and  
6 exo-/endocytosis machinery, like the SNARE complex, are the focus of basic as well as  
7 preclinical investigation and thus the targets for drug discovery. In contrast, lipids have long  
8 been treated as structural support for proteins (Singer and Nicolson, 1972). However, new  
9 evidence has suggested that lipids can actively regulate signaling proteins by defining their  
10 surface localization (Lingwood and Simons, 2010; Simons and Toomre, 2000) or even via direct  
11 modification (Hannun and Obeid, 2008; Yeagle, 2014). One of the best examples is cholesterol,  
12 a major sterol molecule with a tetracyclic ring structure (Simons and Ehehalt; Yeagle, 1985). Its  
13 hydroxyl head can form hydrogen bonds with the carbonyl oxygen of phospholipid head groups,  
14 while its hydrocarbon tail wedges into the non-polar core of the bilayer, “gluing” various acyl  
15 chains. As such, cholesterol is essential for the formation and stabilization of membrane  
16 nanodomains, in which lipids are highly packed and signaling proteins are compartmentalized  
17 (Lingwood and Simons, 2010; Pike, 2006; Simons and Toomre, 2000). Recent structural studies  
18 have shown that cholesterol can stabilize G protein-coupled receptors or promote their  
19 association via direct binding (Cherezov et al., 2007; Hanson et al., 2008). Cholesterol is also  
20 involved in Clathrin-dependent and -independent endocytosis (Subtil et al., 1999) and forms the  
21 membrane force foci for mechanical sensing (Anishkin and Kung, 2013). Therefore, cholesterol  
22 influences major transmembrane signaling pathways.

1 While artificial liposomes, like giant unilamellar vesicles, are suitable for biophysical  
2 investigation, live cell preparations are preferred for studying the physiological and pathological  
3 roles of membrane cholesterol (Simons and Gerl, 2010). However, acute and selective  
4 manipulation of cholesterol within the plasma membrane of live cells has proven technically  
5 challenging (Simons and Gerl, 2010). To date, the most widely used tool is methyl- $\beta$ -  
6 cyclodextrin (M $\beta$ CD), whose hydrophobic cavity can bind and extract cholesterol from the  
7 plasma membrane (Zidovetzki and Levitan, 2007). Statins, a class of HMG-CoA reductase  
8 inhibitors, block cholesterol synthesis and chronically reduce cholesterol across the cell  
9 including the plasma membranes (Liao and Laufs, 2005). Genetic mutations that disrupt  
10 cholesterol transportation, for example NPC1 of Niemann Pick disease, also cause chronic  
11 deprivation of cell membrane cholesterol (Vance and Karten, 2014). However, none of these  
12 methods are capable of manipulating cholesterol in membrane nanodomains or even in  
13 subregions of the plasma membrane (Liao and Laufs, 2005; Vance and Karten, 2014; Zidovetzki  
14 and Levitan, 2007). While the ability to increase membrane cholesterol levels would be equally  
15 essential to the investigation of its functional contribution, the means to do so are even more  
16 limited (Lingwood and Simons, 2010; Zidovetzki and Levitan, 2007). Cholesterol-saturated  
17 M $\beta$ CD is often applied as it releases cholesterol in the presence of a concentration gradient.  
18 However, neither the amount nor the rate of such cholesterol release is predictable (Zidovetzki  
19 and Levitan, 2007), and this method is less effective for cells with high membrane cholesterol  
20 content (Zidovetzki and Levitan, 2007).

21 To address the challenge of manipulating membrane cholesterol, we turned to carbon  
22 nanomaterials, whose surfaces are often hydrophobic (Li et al., 2013b) and thus favorable for  
23 lipid interaction. Graphene, a single-layer carbon crystal (Novoselov et al., 2004), emerged as a

1 promising candidate. Computational modeling and electron microscopy studies have suggested  
2 that graphene nanoflakes (GNFs), with their sharp edges and hydrophobic surfaces, readily insert  
3 into the lipid bilayer, extracting phospholipids and causing the breakdown of prokaryotic cell  
4 membranes (Li et al., 2013a; Tu et al., 2013). Eukaryotic cells, however, seem to be spared from  
5 this destruction (Bendali et al., 2013; Bramini et al., 2016; Chen et al., 2012; Li et al., 2011;  
6 Sahni et al., 2013; Wang et al., 2012). Recent computational studies have suggested that  
7 cholesterol, unique to eukaryotic membranes, tightly surrounds inserted GNFs (Zhang et al.,  
8 2016), suggesting a possible explanation for the observed differences. These studies raise the  
9 possibility of using GNFs as a nanoscale tool to alter membrane cholesterol localization, and,  
10 likely, to modify transmembrane signaling. We empirically tested whether GNFs interact with  
11 cholesterol in mammalian cell membranes, how this interaction affects cholesterol distribution,  
12 and importantly, what then were the functional consequences.

## 13 **Results**

### 14 **Production and characterization of graphene nanoflakes**

15 To obtain high quality GNFs, we used liquid-phase exfoliation (LPE) of graphite powder, which  
16 produces single- and few-layer GNFs in a scalable fashion (Geim, 2009; Hernandez et al., 2008).  
17 We suspended GNFs uniformly in H<sub>2</sub>O containing 2 wt% polyvinylpyrrolidone (PVP), which  
18 prevented aggregation (Fig. 1a). Based on its absorption coefficient at 660nm (Hernandez et al.,  
19 2008), we estimated that the concentration of GNFs suspension was about 26 mg/L. To  
20 characterize the GNFs, we used Raman spectroscopy (Fig. 1b). At 532 nm excitation, GNFs  
21 suspensions exhibited characteristic G peaks ( $\sim 1,580\text{ cm}^{-1}$ ) and 2D peaks ( $\sim 2,700\text{ cm}^{-1}$ ) similar to  
22 bulk graphite (Hernandez et al., 2008). However, unlike graphite, Raman D peaks ( $\sim 1,350\text{ cm}^{-1}$ )  
23 were larger in the GNFs suspensions, suggesting the strong edge effects of nanometer-size GNFs

1 (Ferrari et al., 2006). Next, we performed transmission electron microscopy (TEM) to estimate  
2 the size and thickness of the GNFs. As shown in Figure 1c, the smooth planar structures and  
3 uniform flake edges support the notion that these GNFs are one to few layers with a lateral  
4 dimension of a few hundred nanometers. Notably, we did not observe any contamination to the  
5 GNFs suspension resulting from the LPE process. Furthermore, we conducted atomic force  
6 microscopy (AFM) to measure the size and thickness of the GNFs (Fig. 1d). The majority of the  
7 flakes are 1-2 nm thick (Figure 1e&f), which is expected given the tendency of GNFs to  
8 aggregate during AFM preparation (Lotya et al., 2009) and the presence of residual surfactants  
9 between GNFs and the substrate (Hernandez et al., 2008). Importantly, the distributions of GNFs  
10 thickness and size (Fig. 1f) were consistent with previous reports (Hernandez et al., 2008; Lotya  
11 et al., 2009).

## 12 **Graphene Directly and Selectively Interacts With Cholesterol**

13 To experimentally validate the graphene–cholesterol interaction, we began by mixing GNF  
14 suspension with cell culture media (Fig. 2a). After 1-hour incubation, we isolated GNFs using  
15 size-exclusion filtration and measured the amount of cholesterol in each fraction with a  
16 quantitative enzymatic assay (see online methods). We found that cholesterol was enriched in the  
17 GNFs fraction and depleted in the GNFs-free fraction (Fig. 2a), indicating that GNFs adsorb  
18 cholesterol. To determine if cholesterol directly interacted with the GNFs, we took advantage of  
19 a well-documented property of graphene – it acts as a broad-spectrum acceptor in Förster  
20 resonance energy transfer (FRET) (Kasry et al., 2012). We used a fluorescent cholesterol analog,  
21 TopFluor Cholesterol (TFC, a.k.a. cholesterol conjugated to boron-dipyrromethene, BODIPY)  
22 and performed fluorescence lifetime imaging microscopy (FLIM). TFC is reportedly very similar  
23 to cholesterol in terms of molecular and cellular characteristics (Hölttä-Vuori et al., 2008), and

1 FLIM is a sensitive method for measuring FRET (Bastiaens and Squire, 1999). To provide an  
2 unbiased representation of the FLIM data, we applied the phasor approach, which transforms the  
3 fluorescence decay at every pixel to a point in a phasor plot (Digman et al., 2008). In the absence  
4 of FRET, data points center at a spot on the semicircle, representing single-exponential decays of  
5 fluorescence lifetime; when FRET occurs, data points are shifted inside of the semicircle,  
6 representing multi-exponential decays (Digman et al., 2008). While 1  $\mu$ M TFC in 0.02 wt% PVP  
7 solution exhibited a single-component lifetime (i.e. >99% points clustered on the semicircle)  
8 (Fig. 2b), the addition of GNFs (260  $\mu$ g/L) dispersed points inside the semicircle (Fig. 2b),  
9 suggesting FRET between GNFs and TFC. In contrast, GNFs did not alter BODIPY's  
10 fluorescence lifetime (Fig. 2b), indicating that FRET requires the cholesterol group. We also  
11 tested BODIPY-tagged phosphocholine (TFPC) and sphingomyelin (TFSM), the most abundant  
12 lipids in the plasma membrane and in nanodomains, respectively. Neither lifetime was  
13 significantly affected by GNFs (Fig. 2b and S1), suggesting that GNFs favor cholesterol over PC  
14 or SM. To test if TFC outcompetes other lipids in the plasma membrane, we loaded it in live 3T3  
15 cells, a fibroblast cell line widely used for cell membrane studies. After GNFs application, FRET  
16 was readily seen in patches across the cell surface and confirmed by phasor analysis (Fig. 2c).  
17 GNFs failed to affect membrane-embedded DiO (a common lipophilic fluorescent dye), even  
18 after a prolonged incubation (Fig. S2). Taken together, these results suggest that GNFs  
19 selectively interact with cholesterol.

20 Few approaches exist to measure cholesterol in the plasma membrane. So to test if GNFs affect  
21 membrane cholesterol distribution, we measured their effect on the ability of the plasma  
22 membrane to generate co-existing membrane domains, a process which is regulated by  
23 cholesterol concentration (Baumgart et al., 2007; Yeagle, 1985). This measure of plasma

1 membrane heterogeneity can be readily monitored in cell-derived giant plasma-membrane  
2 vesicles (GPMVs), a preparation with molecular composition and biophysical properties similar  
3 to those of the plasma membrane (Sezgin et al., 2012). GPMVs exhibit a temperature-dependent  
4 separation into micron-sized lipid ordered ( $L_o$ ) and disordered ( $L_d$ ) phases (Levental et al., 2009)  
5 (Fig. 2d1 insets), and the temperature at which 50% of vesicles contain co-existing  $L_o$  and  $L_d$   
6 domains is defined as the average miscibility temperature,  $T_{misc}$ . We reasoned that pretreatment  
7 of cells with GNFs would transiently increase plasma membrane cholesterol levels and thus alter  
8  $T_{misc}$ . When cells were treated with GNFs for 1 hour before GPMV isolation,  $T_{misc}$  of the derived  
9 GPMVs was lowered from 27.8 °C in controls to 25.2 °C (Fig. 2d1, Fig. S3), a change similar to  
10 increased membrane cholesterol (Levental et al., 2009). Consistently, Filipin staining showed  
11 increased surface cholesterol after the 1-hour treatment (Fig. S4). Given that GPMVs, once  
12 vesiculated, are isolated from intracellular cholesterol supplies, we carried out a separate  
13 experiment to test if GNFs would modulate membrane heterogeneity in isolated GPMVs. Since  
14 GNFs can attract cholesterol, we hypothesized that GNFs would preferentially stabilize the  
15 cholesterol-rich  $L_o$  domains (Baumgart et al., 2007; Gray et al., 2013). In line with this  
16 prediction, we found that GNFs-treated GPMVs had an increased  $L_o$  fraction (Fig. 2d3) and an  
17 increased  $T_{misc}$  (Fig. 2d2 and Fig. S5). Taken together, these data support the idea that  
18 membrane-inserted GNFs attract endogenous cholesterol and thus increases the immiscibility of  
19 the two phases. To study the biophysical effect of GNFs in live cells, we performed generalized  
20 polarization (GP) imaging, which utilizes fluorescent reporters sensitive to membrane lipid order  
21 (Barrantes et al., 1999). We labeled 3T3 plasma membranes with C-laurdan, an improved GP  
22 probe (Kim et al., 2007), and performed time-lapse imaging. GNFs significantly increased the  
23 GP value (Fig. 2e1&3) in a time-dependent manner (Fig. 2e2), suggesting a GNF-induced



1 cholesterol enrichment in the plasma membrane. FLIM, GPMV and GP imaging results  
2 collectively demonstrate that GNFs can (1) directly and favorably interact with cholesterol, (2)  
3 locally enrich cholesterol in the plasma membrane, and (3) consequently increase membrane  
4 lipid packing.

## 5 **Graphene Allosterically Modulates Transmembrane Receptors**

6 As membrane cholesterol directly or indirectly regulates many integral proteins (Lingwood and  
7 Simons, 2010; Oates and Watts, 2011; Yeagle, 2014), we explored the utility of GNFs in  
8 manipulating transmembrane proteins. To do so, we chose ubiquitously expressed and  
9 therapeutically important P2Y receptors (P2YRs), a class of GPCRs preferentially localized  
10 within cholesterol-enriched nanodomains (N and Volonte, 2013). When activated by  
11 extracellular ATP, P2YRs trigger a  $\text{Ca}^{2+}$ -release from internal stores, which can be measured by  
12 fluorescent  $\text{Ca}^{2+}$ -indicators using time-lapse imaging (Zhang et al., 2004). In 3T3 cells, we  
13 confirmed that P2YRs were the predominant mediator of ATP-induced  $\text{Ca}^{2+}$ -responses (Fig. S6  
14 and supplementary results). Membrane conductance remained unchanged with or without GNFs  
15 treatment (Fig. S7), indicating no effect on cell membrane permeability, unlike what was  
16 observed in prokaryotes (Tu et al., 2013). Although GP and Filipin imaging suggest that GNFs  
17 increase cell surface cholesterol, gas chromatography coupled with a flame ionization detector  
18 (GC-FID) mass spectroscopy found no significant changes in total cellular cholesterol, even after  
19 a 24-hour treatment (Fig. S8). These results suggest that, instead of changing whole-cell  
20 cholesterol metabolism, GNFs enrich cholesterol in the plasma membrane – consistent with the  
21 changes in miscibility temperature in the GPMV studies.

22 As a measure of P2YR activity, we applied two consecutive ATP stimuli at a 1-minute interval,  
23 which is insufficient to replenish internal  $\text{Ca}^{2+}$  stores. Increased P2YR activity should thus make

1 the first response larger but the second smaller. The ratio of 2<sup>nd</sup> vs. 1<sup>st</sup> Ca<sup>2+</sup>-responses offers a  
2 more reliable readout of P2YR activity, as it is insensitive to the number of surface P2YRs and  
3 the capacity of internal Ca<sup>2+</sup> stores, both of which can be variable among cells. We treated cells  
4 for 5 minutes and 1 hour, as these shorter time periods are more likely to result in cell surface  
5 localization rather than internalization of GNFs. 5-minute treatment significantly increased the  
6 first response and reduced the second (Fig. 3a1), resulting in a smaller 2<sup>nd</sup> vs. 1<sup>st</sup> response ratio  
7 (Fig. 3a2). 1-hour treatment also led to a smaller ratio, although the 2<sup>nd</sup> response was slightly  
8 larger than that of controls (Fig. 3a). It may be because the 1-hour treatment promotes the  
9 refilling of internal Ca<sup>2+</sup>-stores, which is reportedly regulated by membrane cholesterol (Dionisio  
10 et al., 2011; Gwozdz et al., 2012). To confirm the involvement of membrane cholesterol in P2YR  
11 enhancement, 0.5 mM M $\beta$ CD was co-applied with GNFs, which diminished the GNF-induced  
12 enhancement of Ca<sup>2+</sup>-response (Fig. 3a). In addition, GNFs alone did not cause any Ca<sup>2+</sup>-  
13 response (Fig. 3c1), nor did they affect cell membrane permeability (Fig. S7), which further  
14 excludes the possibility that GNFs permeabilize the plasma membrane, causing Ca<sup>2+</sup> influx. To  
15 confirm that GNFs' direct interaction with membrane cholesterol is required, we pre-coated  
16 GNFs with 1% W/V SDS (O'Connell et al., 2002), which leads to complete surface coverage of  
17 GNFs (Hsieh et al., 2013b) without affecting the dispersion stability (Hsieh et al., 2013a). SDS-  
18 coated GNFs failed to increase the ATP-induced Ca<sup>2+</sup>-response, even after 1-hour treatment (Fig.  
19 3b). Furthermore, we either applied ATP and GNFs simultaneously or separately to determine  
20 whether GNFs act orthosterically or allosterically. Only co-application of GNFs with ATP  
21 potentiated the Ca<sup>2+</sup>-response (Fig. 3c), demonstrating that GNFs behavior as a positive allosteric  
22 modulator for P2YRs.

## 23 **Graphene Promotes Neurotransmitter Release**

1 In addition to the modulation of membrane proteins, cholesterol is also critical to the secretion of  
2 signaling molecules. One of the best examples is the highly choreographed release of  
3 neurotransmitter from synaptic vesicles in nerve terminals. Emerging evidence has shown that  
4 cholesterol is essential for the origination and maintenance of synaptic vesicle pools (Dason et  
5 al., 2014; Mauch et al., 2001), for the localization and function of exo- and endocytotic proteins,  
6 and for the fluidity and curvature of vesicular and plasma membranes (Chang et al., 2009;  
7 Kreutzberger et al., 2015). Therefore, we asked if GNFs could be used to modulate  
8 neurotransmitter release. Here we used hippocampal cultures, an established preparation for  
9 studying neurotransmission. First, we tested if GNFs could elevate cholesterol within neuronal  
10 membranes, which already contain high levels of cholesterol. In nearly all treated neurons, we  
11 observed a significant increase of GP value after 1 hour GNF treatment (Fig. 4a1), although the  
12 increase was slower and smaller than that seen in astrocytes (Fig. 4a2). As a gross measure of  
13 functional impact, we performed whole-cell patch clamp recordings and measured miniature  
14 evoked postsynaptic currents (mEPSCs) as well as postsynaptic NMDA- and AMPA-receptor  
15 mediated currents ( $I_{\text{NMDAR}}$  and  $I_{\text{AMPA}}$ ). Between GNF-treated neurons and controls, there was no  
16 significant difference in mEPSC amplitude or  $I_{\text{NMDAR}}$  vs.  $I_{\text{AMPA}}$  ratio (Fig. S9). Inter-event  
17 interval, however, was significantly reduced after GNF treatment (Fig. S9a). Taken together, this  
18 indicated that the effect of GNFs was presynaptic rather than postsynaptic.

19 To directly examine if there were presynaptic changes, we used FM4-64, whose loading and  
20 unloading reflect the amount of releasable vesicles and their release probability ( $P_{r,v}$ ),  
21 respectively (Betz and Bewick, 1992). 1-hour GNFs treatment increased FM4-64 uptake (Fig.  
22 4b1), suggesting an enhancement of activity-evoked vesicle retrieval. FM4-64 fluorescence  
23 intensity was correlated to GP value at synaptic boutons (Fig. 4b2), suggesting that the GNFs'

1 presynaptic effect is associated with increased membrane cholesterol. During subsequent field  
2 stimulation, the rate of FM4-64 destaining in GNF-treated neurons was significantly faster (Fig.  
3 4c1), indicating a higher release probability ( $P_{r,v}$ ) and/or a larger fraction of releasable synaptic  
4 vesicles. Again, pre-coating of GNFs with SDS abolished these effects (Fig. 4c2), demonstrating  
5 that a direct GNF-cholesterol interaction is required.

6 To further illustrate the changes in synaptic vesicle turnover, we turned to quantum dot (Qdot)  
7 enabled single vesicle imaging (Zhang et al., 2009). The hydrodynamic diameter of the Qdots we  
8 used was ~15 nm, smaller than the luminal diameter of a synaptic vesicle (~25 nm) but much  
9 larger than the estimated fusion pore size (~1-3 nm). This restricted the loading to one Qdot per  
10 synaptic vesicle (Zhang et al., 2007), which allowed for an accurate estimate of the total  
11 releasable pool (TRP) of vesicles at each synapse. We calculated the total number of Qdots taken  
12 up after maximal loading (Fig. S10a) - i.e. strong stimulation (2 minutes, 90 mM  $K^+$ ) with a high  
13 concentration of Qdots (100 nM) (Zhang et al., 2009). In good agreement with FM4-64 data, 1-  
14 hour treatment, on average, resulted in a 12% increase of releasable synaptic vesicles (Fig.  
15 S10b). This is also consistent with the time needed to achieve a significant increase of neuronal  
16 GP value. Using time-lapse single Qdot imaging, we analyzed the turnover kinetics of synaptic  
17 vesicles. We applied the same stimulation but used a much lower concentration of Qdots (0.8  
18 nM), which resulted in the random labeling of individual vesicles across the TRP (Zhang et al.,  
19 2009). Quantal analysis of Qdot photoluminescence in FM4-64 defined individual synaptic  
20 boutons (Zhang et al., 2009) confirmed single vesicle loading (Fig. S10c). Neurons were  
21 perfused for 15 minutes to remove excess Qdots and a 10-Hz 60-s electric field stimulation was  
22 applied to evoke synaptic vesicle release. Deconvolution of Qdot photoluminescence changes  
23 allowed us to distinguish between two different modes of vesicle turnover, the classical full-

1 collapse fusion (FCF), or fast and reversible fusion (FRF): a small increase immediately  
2 followed by the complete loss of unitary Qdot photoluminescence or a small increase alone,  
3 respectively (Zhang et al., 2009) (Fig. S10d). After 1-hour GNF treatment, there were  
4 significantly more FRF events during stimulation and an increase in the number of FRF events  
5 per vesicle (Fig. S10f), leading to a higher FRF ratio (Fig. 4d1). Furthermore, the time to the first  
6 fusion event for individual vesicles was significantly shorter in GNF-treated neurons (Fig. S10e),  
7 in good agreement with a higher  $P_{r,v}$ . To confirm that these changes in synaptic vesicles were  
8 indeed due to GNF-induced cholesterol enrichment, we co-applied M $\beta$ CD, which offset the  
9 GNF-induced changes in synaptic vesicle turnover as measured by both FM and Qdot imaging  
10 (Fig. 4c&d). To verify the necessity of a direct interaction between GNFs and plasma membrane  
11 cholesterol, we again used SDS-coated GNFs. As expected, pre-coated GNFs failed to induce  
12 vesicular changes (Fig. 4c2 and d2). Altogether, these results suggest that, by inducing local  
13 cholesterol enrichment, GNFs can promote neurotransmission in a presynaptic fashion,  
14 illustrating a new method to enhance neurotransmission.

## 15 **Discussion**

16 Recent advances in single molecule tracking, protein engineering, and super-resolution imaging  
17 have provided the ability to monitor nanodomain dynamics at previously unprecedented  
18 spatiotemporal resolution (Simons and Gerl, 2010). However, progress in manipulating  
19 nanodomains with matching precision has been far more limited. Particularly, the ability to  
20 stabilize the  $L_o$  phase in the plasma membrane of live cells would provide valuable insight into  
21 the existence, organization, and functionality of membrane nanodomains (Lingwood and Simons,  
22 2010). Here, we provide independent lines of evidence to demonstrate a direct interaction  
23 between GNFs and cholesterol. GNFs attract membrane cholesterol upon insertion into cell

1 membranes, which leads to the formation or stabilization of cholesterol-enriched  $L_o$  domains and  
2 thus changes the architecture and biophysical properties of the plasma membrane. Unlike  
3 pharmacological and genetic tools, such as statins or the NPC1 mutation, GNFs act on cell  
4 membranes directly and acutely, rearranging endogenous membrane cholesterol with little  
5 impact on total cell cholesterol. In contrast to existing biochemical tools like cyclodextrins,  
6 GNFs offer a faster and more targeted way to enrich cholesterol in the plasma membrane. In  
7 different cell types and for different signaling pathways, the effect of GNFs is determined by the  
8 specific roles membrane cholesterol plays.

9 Here, we have used two different cell preparations to demonstrate the utility of GNFs. For signal  
10 transduction via transmembrane receptors like P2YRs, GNFs can allosterically promote their  
11 activity, likely because of the potentiating role cholesterol plays in receptor localization,  
12 trafficking, stability, and dimerization (Cherezov et al., 2007; Hanson et al., 2008; N and  
13 Volonte, 2013). The time needed for GNFs to enhance P2YRs matches that of the GNF-induced  
14 GP increase in live cells (i.e. both in seconds), suggesting that lipid phase stabilization  
15 contributes to the receptor enhancement<sup>42</sup>. Equally possible is that elevated cholesterol promotes  
16 GPCR activity via direct binding, which facilitates receptor dimerization or association with  
17 downstream factors (Cherezov et al., 2007; Hanson et al., 2008). For the secretion of signaling  
18 factors, such as neurotransmitters in the nervous system, GNFs can potentiate release by  
19 promoting vesicle origination, recycling, and membrane fusion/fission, all of which are  
20 potentiated by increased membrane cholesterol (Chang et al., 2009; Dason et al., 2014;  
21 Kreuzberger et al., 2015; Mauch et al., 2001). While reducing cholesterol in neurons with  
22 conventional tools like M $\beta$ CD demonstrated its importance to synaptic plasticity via modulation

1 of ion channels <sup>61</sup> and receptors <sup>62</sup>, GNFs, by increasing synaptic membrane cholesterol, reveal  
2 new routes to achieve presynaptic potentiation (i.e. by accelerating synaptic vesicle turnover).

3 We observed a difference between 3T3 cells and neurons in the time courses of GNF's effects,  
4 possibly due to a significant difference of initial membrane cholesterol concentration. In support  
5 of this idea, astrocytes, similar to 3T3 cells (with less membrane cholesterol than neurons),  
6 exhibited a significantly faster and larger average increase of GP value than neurons (Fig. 4a2).

7 It is also possible that the stochastic and diffusion-limited process of unmodified GNFs reaching  
8 synapses underlies their slower presynaptic effects. As better surface functionalization and  
9 conjugation strategies for carbon nanomaterials are rapidly evolving (Mao et al., 2013), the  
10 conjugation of GNFs with biomolecules like antibodies or ligands may allow the rapid and  
11 selective targeting of GNFs to specific subcellular sites, achieving a spatiotemporal precision  
12 suitable for the manipulation of highly dynamic membrane nanodomains or even the membranes  
13 of subcellular organelles. Furthermore, graphene-based cholesterol manipulation will accelerate  
14 the investigation of cholesterol-related disorders. In particular, site-specific modification of  
15 cholesterol will be informative in understanding the pathological contribution of membrane  
16 cholesterol in related diseases (Maxfield and Tabas, 2005), such as Niemann Pick type C disease  
17 and Alzheimer's disease.

## Figures

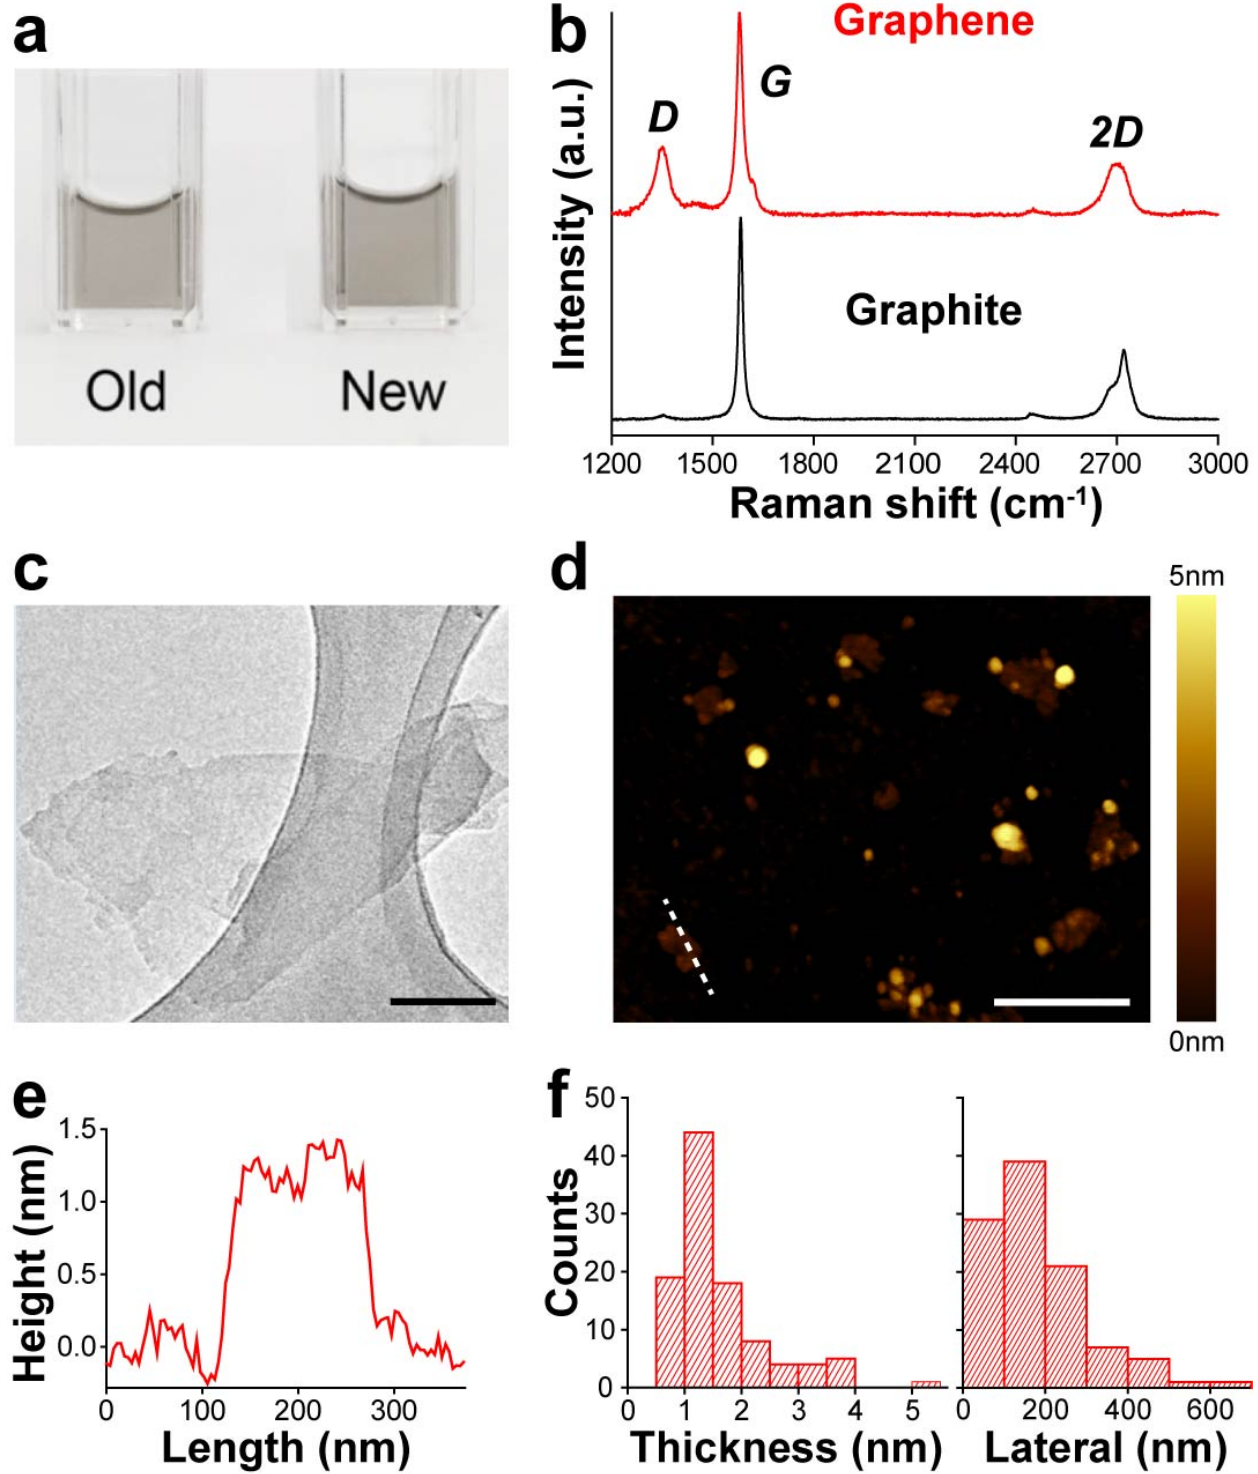



**Figure 1. Characterization of graphene nanoflakes.** (a) Pictures of GNF stock solutions. The left is one-year old and the right is freshly prepared. Both contain 26 mg/L GNFs. (b) Raman spectra for GNFs suspended in 2 wt% PVP (red) and bulk graphite (black), respectively. (c) Sample TEM image of a GNF. Scale bar, 100 nm. (d) Sample AFM image of dispersed GNFs. Scale bar, 500 nm. (e) Line profile of a GNF along the white dashed line in (d). (f) The distributions of GNF thickness and lateral dimension obtained from AFM image analysis. GNF, graphene nanoflake; PVP, polyvinylpyrrolidone; TEM, transmission electron microscopy; AFM, atomic force microscopy.

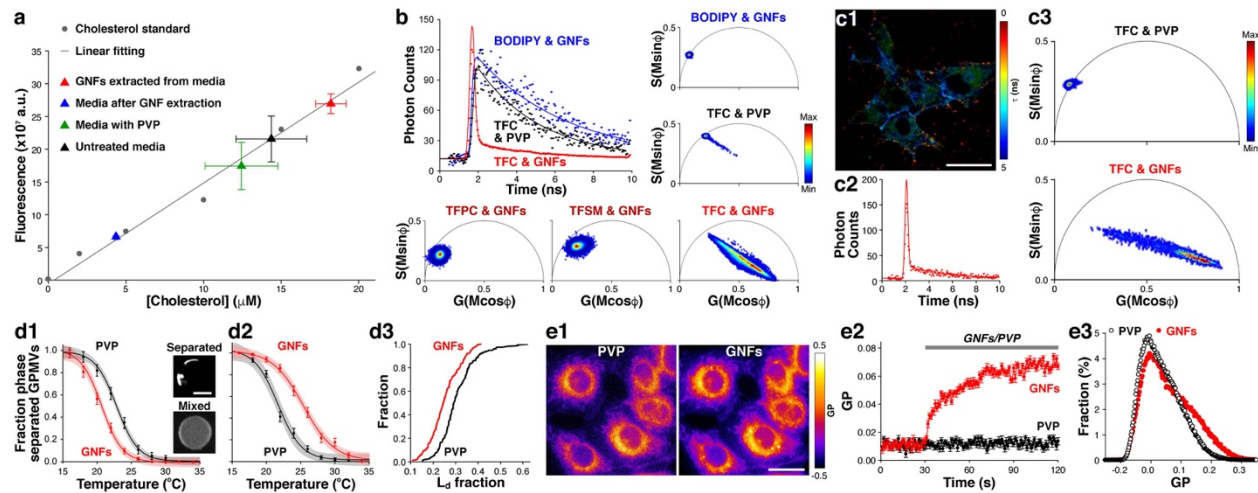

**Figure 2. Graphene nanoflakes interact with cholesterol and change cell membrane organization.** (a) Fluorescent enzymatic assay of cholesterol content in untreated, PVP, or GNF-treated cell culture media. The working curve was generated using cholesterol standards. (b) FLIM data for BODIPY or TFC in the presence of GNFs or PVP controls; best fits are 1 or 2-component exponential decays (in ns,  $\tau_{\text{TFC\&PVP}} = 3.36$ ,  $\tau_{\text{BODIPY\&GNFs}} = 4.47$ , and  $\tau_{\text{TFC\&GNFs(1)}} = 0.15$  and  $\tau_{\text{TFC\&GNFs(2)}} = 3.19$ ). FLIM data are also displayed in corresponding phasor plots along with those for GNF-treated TFPC and TFSM. (c) FLIM data for TFC loaded in the cell membrane after PVP or GNFs application. (c1) Representative pseudo-color shaded FLIM image of TFC-labeled 3T3 cells treated with GNFs. Scale bar, 20  $\mu\text{m}$ . (c2) Corresponding FLIM data (red) with a 2-component fit (in ns,  $\tau_1 = 0.15$  and  $\tau_2 = 3.19$ ). (c3) Corresponding phasor plots. (d) Temperature-dependent lipid phase separation of GPMVs after PVP (black) or GNFs (red) treatment. (d1)  $T_{\text{misc}}$  of GPMVs isolated from 3T3 cells pretreated with PVP or GNFs for 1 hour.  $L_d$  is visualized by FAST-DiI. Phase separated fraction was calculated from the numbers of phase-separated and non-separated GPMVs. Area of light shading shows the 95% CI on the sigmoidal fit function. Insets are sample images of phase separated or mixed vesicles. Scale bar, 5  $\mu\text{m}$ . (d2)  $T_{\text{misc}}$  of GPMVs for 1-hour oGNFs or PVP treatment after isolation from 3T3 cells.

(**d3**) Cumulative distribution of  $L_d$  fractions of GPMVs in (**d2**) at 15 °C. (**e**) GP imaging of live 3T3 cells preloaded with C-Laurdan. (**e1**) Sample GP images of same cells treated with PVP (left) and GNFs (right) for 5 minutes each. Scale bar, 10  $\mu\text{m}$ . (**e2**) Average GP values during PVP (black) and GNFs (red) application. (**e3**) GP distributions in the presence of PVP (open black circles) or GNFs (filled red dots) ( $p < 0.05$ ). Error bars are S.E.M. BODIPY, boron-dipyrromethene; TFC, TopFluor cholesterol (BODIPY-cholesterol); FLIM, fluorescence lifetime microscopy; TFPC, TopFluor phosphocholine; TFSM, TopFluor sphingomyelin; GPMV, giant plasma-membrane vesicle;  $T_{\text{misc}}$ , average miscibility transition temperature;  $L_d$ , disordered liquid phase; GP, generalized polarization.

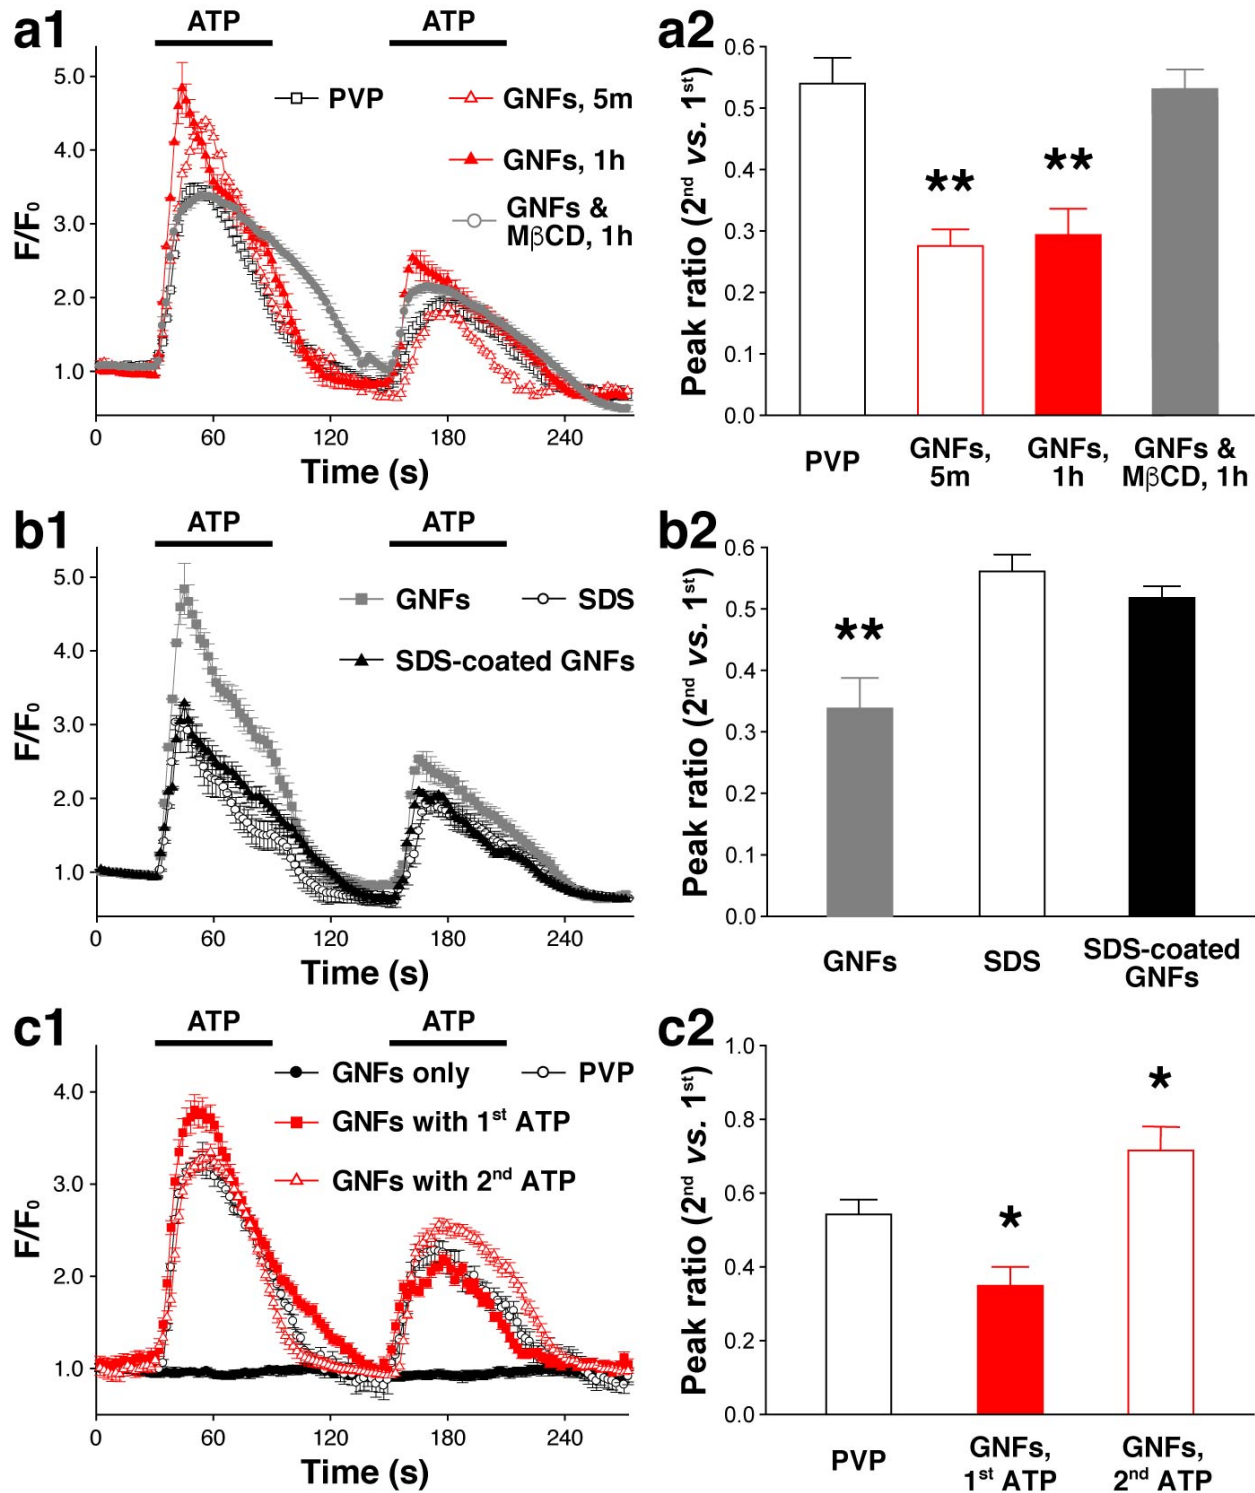

**Figure 3. GNFs potentiate P2YR signaling in 3T3 cells. (a1)** Effect of 5-minute (open red triangles) or 1-hour (filled red triangles) GNFs, PVP (open black squares), or 1-hour GNFs plus

M $\beta$ CD treatment on Ca<sup>2+</sup>-response to 100  $\mu$ M ATP. **(a2)** Ratios of 2<sup>nd</sup> to 1<sup>st</sup> peak amplitude (all n = 6,  $p < 0.01$  for 5m and 1h GNFs, and  $p > 0.05$  for 1h GNFs & M $\beta$ CD). **(b1)** Effect of SDS coating of GNFs (black triangles) on ATP-induced Ca<sup>2+</sup>-response, SDS (open circles) and GNFs (gray squares) are shown as controls. **(b2)** Ratios of 2<sup>nd</sup> to 1<sup>st</sup> peak amplitude (all n = 6, and  $p > 0.05$  for SDS&GNFs vs. SDS,  $p < 0.01$  for SDS&GNFs vs. GNFs). **(c1)** Co-application of GNFs with either the 1<sup>st</sup> (filled red squares) or 2<sup>nd</sup> (open red triangle) ATP application, GNFs alone (filled black circles) and PVP (open black circles). **(c2)** Ratios of 2<sup>nd</sup> to 1<sup>st</sup> peak amplitude (all n = 6,  $p < 0.05$  for both GNFs co-applications vs. PVP). \* $p < 0.05$ , \*\* $p < 0.01$ . M $\beta$ CD, methyl- $\beta$ -cyclodextrin, ATP, adenosine triphosphate, SDS, sodium dodecyl sulfate.

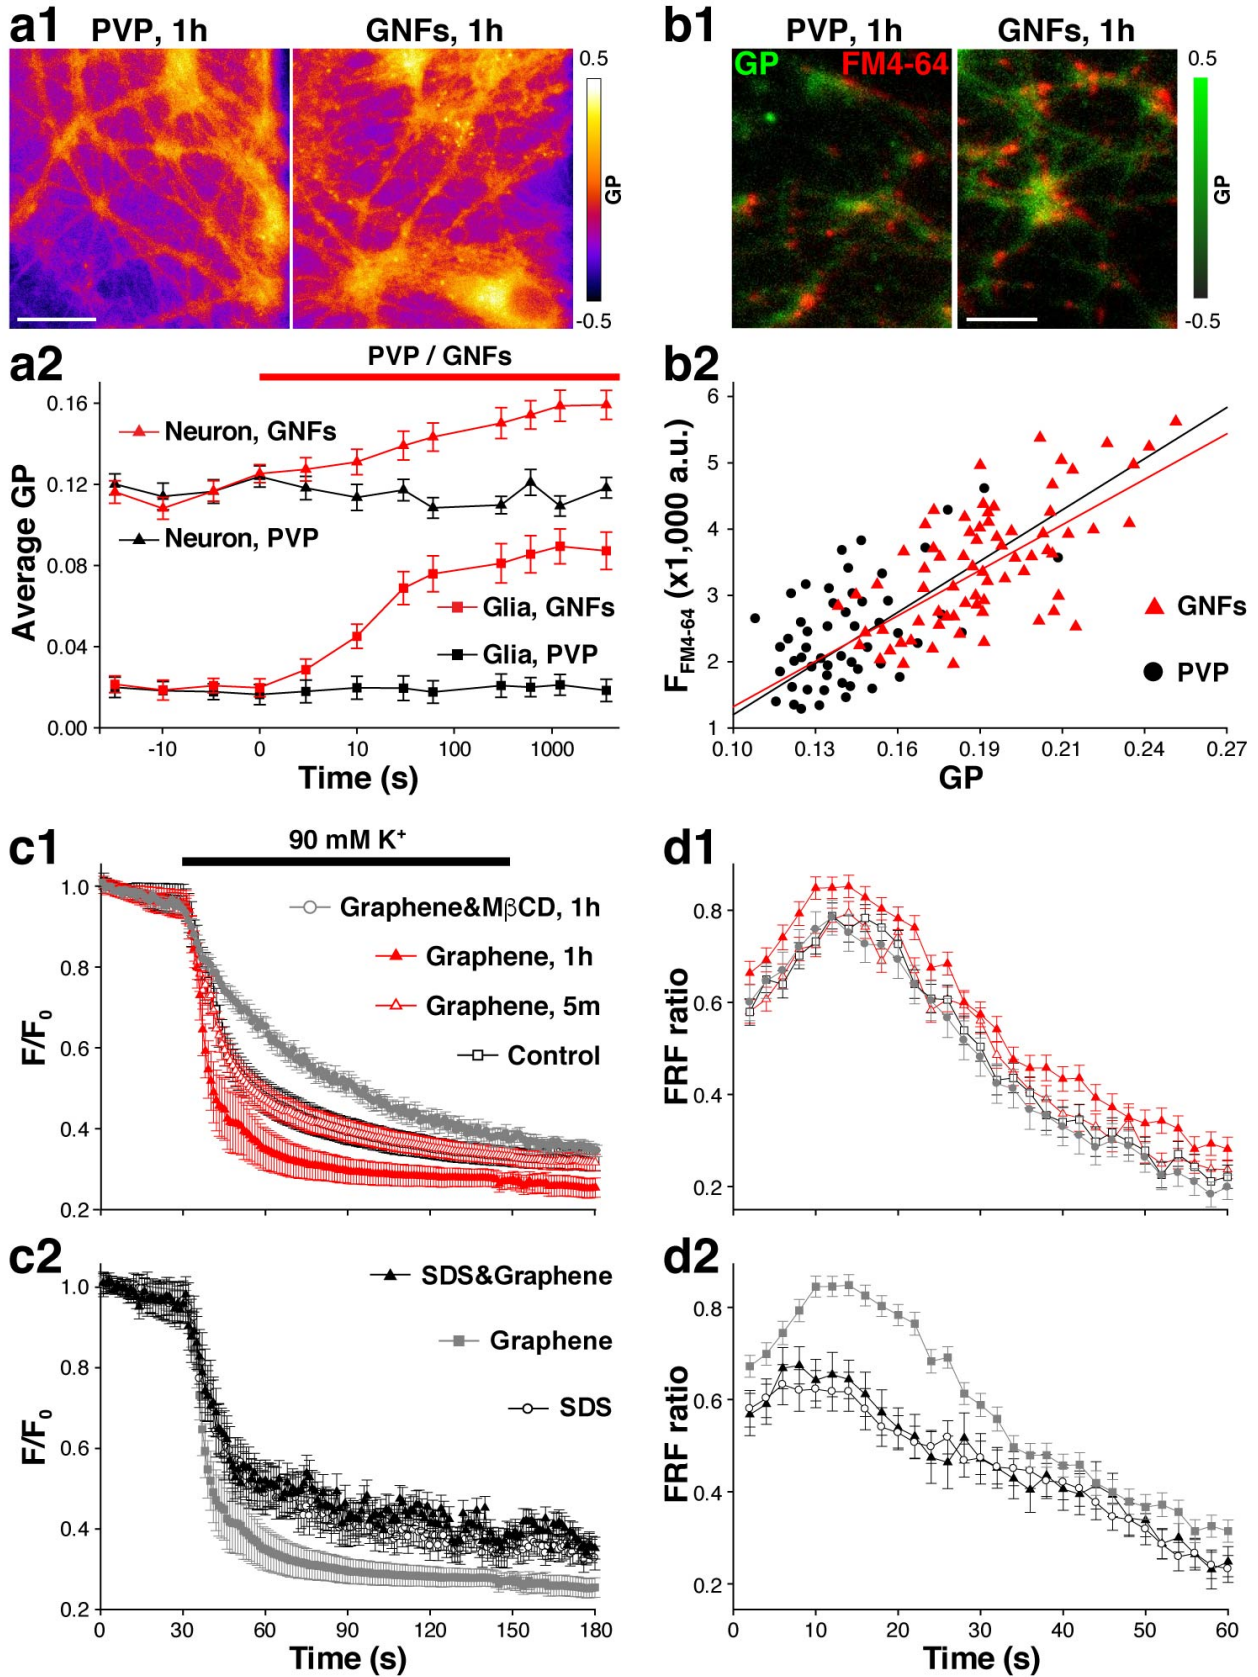

**Figure 4. GNFs potentiate neurotransmission by increasing membrane cholesterol.** (a) GP imaging of neurons. (a1) Sample GP images of neurons after 1 h treatment with either PVP (left) or GNFs (right). Scale bar, 20  $\mu\text{m}$ . (a2) Time-correlated GP value for PVP (black) or GNFs (red) application for both neurons (triangles) and glia (squares). (b) C-Laurdan and FM4-64 co-labelling. (b1) Sample GP (green) images of neurons after 1 h treatment with either PVP (left) or GNFs (right) are superimposed with FM4-64 (red) images of the same fields of view. (b2) Scatter plot of FM4-64 intensity vs. GP value for GNFs (red triangles) and PVP (black circles). Linear regression fits have R of 8.821 for GNFs and 7.924 for PVP. (c) FM destaining with 2 minutes 90 mM  $\text{K}^+$ . (c1) The destaining after 5-minute (open red triangles) or 1-hour (filled red triangles) treatment with GNFs or 1-hour GNFs & M $\beta$ CD (open black circles) co-treatment are compared with 1-hour PVP treatment (open black squares) (all  $n = 6$ ; for 5 min,  $p > 0.05$ ; for 1 h,  $p < 0.05$ ; for GNFs & M $\beta$ CD,  $p > 0.05$ ). (c2) Destaining after 1-hour (filled gray squares) treatment with GNFs is significantly faster than 1-hour SDS (open circle) or SDS-coated GNFs treatment (filled black triangles) (all  $n = 6$ ; both  $p < 0.05$ ). (d) Qdot-based measurement of fusion modes during 1 min 10 Hz electric field stimulation, shown as the ratio of FRF vs all fusion events. (d1) Four conditions same as (c1) with the same symbol sets (all  $n = 6$ ; between PVP and 5-minute GNFs,  $p > 0.05$ ; between PVP and 1-hour GNFs,  $p < 0.05$ ; between PVP and GNFs & M $\beta$ CD,  $p > 0.05$ ). (d2) Same conditions as (c2) with the same symbol sets (all  $n = 6$ ; both  $p < 0.05$ ). Qdot, quantum dot; FCF, full-collapse fusion; FRF, fast and reversible fusion.

## **Associated content**

### **Supporting Information:**

Materials and Methods;

Supplementary Results;

Supplementary Figures S1-10.

## **Author information**

### **Corresponding Author**

\*Correspondence to:

Qi Zhang ([qi.zhang@vanderbilt.edu](mailto:qi.zhang@vanderbilt.edu))

Yaqiong Xu ([yaqiong.xu@vanderbilt.edu](mailto:yaqiong.xu@vanderbilt.edu))

## **Author Contributions**

K.E.K. and Q.Z. designed experiments with input from all authors and wrote the manuscript. K.E.K. and Q.Z. performed all imaging and spectrofluorometry experiments. R.M.L. performed all electrophysiology experiments. K.E.K. and J.R.M. performed whole-cell cholesterol quantification. K.E.K. and A.T.S. performed all FLIM measurements with input from M.C.S. and Q.Z. K.E.K. and K.R. performed all GPMV experiments with input from A.K.K. and Q.Z. T.H., Y.Z. and Y.Q.X. prepared GNFs, and performed all TEM, Raman spectroscopy and AFM measurements. J.A.M. supervised cholesterol quantification, A.K.K. supervised GPMV experiments, M.C.S. supervised FLIM experiments, and Q.Z. supervised all experiments.



## **Funding Sources**

This work is funded by the National Science Foundation (ECCS-1055852 and CBET-1067213 to Y.Q.X., CBET-1264982 to Y.Q.X. and Q.Z., DGE-0909667 to A.T.S.), National Institutes of Health (DA025143 and OD00876101 to Q.Z., GM106720 to A.K.K., and CA185747 to M.C.S.), the Vanderbilt Center for Innovative Technology, and by a Vanderbilt University Discovery Grant.

## **Acknowledgment**

We thank I. Kristaponyte for technical assistance with cell culture. We thank Joseph T. Sharick for assistance in FLIM data acquisition and analysis. We thank H.E. Hamm, A. H. Brown, and K.P.M. Currie for valuable comments and discussions. We thank all members of the Zhang and Xu laboratories for their support.

## **Abbreviations**

GNF, graphene nanoflake; PVP, polyvinylpyrrolidone; TEM, transmission electron microscopy; AFM, atomic force microscopy; BODIPY, boron-dipyrromethene; TFC, TopFluor cholesterol (BODIPY-cholesterol); FLIM, fluorescence lifetime microscopy; TFPC, TopFluor phosphocholine; TFSM, TopFluor sphingomyelin; GPMV, giant plasma-membrane vesicle;  $T_{\text{misc}}$ , average miscibility transition temperature;  $L_d$ , disordered liquid phase; GP, generalized polarization; M $\beta$ CD, methyl- $\beta$ -cyclodextrin, ATP, adenosine triphosphate, SDS, sodium dodecyl sulfate; Qdot, quantum dot; FCF, full-collapse fusion; FRF, fast and reversible fusion.

## References

- Anishkin, A., and Kung, C. (2013). Stiffened lipid platforms at molecular force foci. *Proc Natl Acad Sci U S A* *110*, 4886-4892.
- Barrantes, F.J., Antollini, S., and Massol, R. (1999). Fluorescence studies of the nicotinic acetylcholine receptor in its membrane environment. *Biosci Rep* *19*, 335-344.
- Bastiaens, P.I.H., and Squire, A. (1999). Fluorescence lifetime imaging microscopy: spatial resolution of biochemical processes in the cell. *Trends in cell biology* *9*, 48-52.
- Baumgart, T., Hammond, A.T., Sengupta, P., Hess, S.T., Holowka, D.A., Baird, B.A., and Webb, W.W. (2007). Large-scale fluid/fluid phase separation of proteins and lipids in giant plasma membrane vesicles. *Proc Natl Acad Sci U S A* *104*, 3165-3170.
- Bendali, A., Hess, L.H., Seifert, M., Forster, V., Stephan, A.-F., Garrido, J.A., and Picaud, S. (2013). Purified Neurons can Survive on Peptide-Free Graphene Layers. *Advanced Healthcare Materials* *2*, 929-933.
- Betz, W.J., and Bewick, G.S. (1992). Optical Analysis of Synaptic Vesicle Recycling at the Frog Neuromuscular Junction. *Science* *255*, 200.
- Bramini, M., Sacchetti, S., Armirotti, A., Rocchi, A., Vazquez, E., Leon Castellanos, V., Bandiera, T., Cesca, F., and Benfenati, F. (2016). Graphene Oxide Nanosheets Disrupt Lipid Composition, Ca<sup>2+</sup> Homeostasis, and Synaptic Transmission in Primary Cortical Neurons. *ACS Nano*.
- Chang, J., Kim, S.A., Lu, X., Su, Z., Kim, S.K., and Shin, Y.K. (2009). Fusion step-specific influence of cholesterol on SNARE-mediated membrane fusion. *Biophys J* *96*, 1839-1846.
- Chen, G.Y., Pang, D.W.P., Hwang, S.M., Tuan, H.Y., and Hu, Y.C. (2012). A graphene-based platform for induced pluripotent stem cells culture and differentiation. *Biomaterials* *33*, 418-427.
- Cherezov, V., Rosenbaum, D.M., Hanson, M.A., Rasmussen, S.G., Thian, F.S., Kobilka, T.S., Choi, H.J., Kuhn, P., Weis, W.I., Kobilka, B.K., *et al.* (2007). High-resolution crystal structure of an engineered human beta2-adrenergic G protein-coupled receptor. *Science* *318*, 1258-1265.
- Dason, J.S., Smith, A.J., Marin, L., and Charlton, M.P. (2014). Cholesterol and F-actin are required for clustering of recycling synaptic vesicle proteins in the presynaptic plasma membrane. *J Physiol* *592*, 621-633.
- Digman, M.A., Caiolfa, V.R., Zamai, M., and Gratton, E. (2008). The phasor approach to fluorescence lifetime imaging analysis. *Biophys J* *94*, L14-16.
- Dionisio, N., Galan, C., Jardin, I., Salido, G.M., and Rosado, J.A. (2011). Lipid rafts are essential for the regulation of SOCE by plasma membrane resident STIM1 in human platelets. *Biochim Biophys Acta* *1813*, 431-437.
- Ferrari, A.C., Meyer, J.C., Scardaci, V., Casiraghi, C., Lazzeri, M., Mauri, F., Piscanec, S., Jiang, D., Novoselov, K.S., Roth, S., *et al.* (2006). Raman spectrum of graphene and graphene layers. *Phys Rev Lett* *97*, 187401.
- Geim, A.K. (2009). Graphene: Status and Prospects. *Science* *324*, 1530-1534.
- Gray, E., Karlake, J., Machta, B.B., and Veatch, S.L. (2013). Liquid general anesthetics lower critical temperatures in plasma membrane vesicles. *Biophys J* *105*, 2751-2759.
- Gwozdz, T., Dutko-Gwozdz, J., Schafer, C., and Bolotina, V.M. (2012). Overexpression of Orai1 and STIM1 proteins alters regulation of store-operated Ca<sup>2+</sup> entry by endogenous mediators. *J Biol Chem* *287*, 22865-22872.
- Hannun, Y.A., and Obeid, L.M. (2008). Principles of bioactive lipid signalling: lessons from sphingolipids. *Nat Rev Mol Cell Biol* *9*, 139-150.

- Hanson, M.A., Cherezov, V., Griffith, M.T., Roth, C.B., Jaakola, V.P., Chien, E.Y., Velasquez, J., Kuhn, P., and Stevens, R.C. (2008). A specific cholesterol binding site is established by the 2.8 Å structure of the human beta2-adrenergic receptor. *Structure* *16*, 897-905.
- Hernandez, Y., Nicolosi, V., Lotya, M., Blighe, F.M., Sun, Z., De, S., McGovern, I.T., Holland, B., Byrne, M., Gun'Ko, Y.K., *et al.* (2008). High-yield production of graphene by liquid-phase exfoliation of graphite. *Nat Nanotechnol* *3*, 563-568.
- Hölttä-Vuori, M., Uronen, R.-L., Repakova, J., Salonen, E., Vattulainen, I., Panula, P., Li, Z., Bittman, R., and Ikonen, E. (2008). BODIPY-Cholesterol: A New Tool to Visualize Sterol Trafficking in Living Cells and Organisms. *Traffic* *9*, 1839-1849.
- Hsieh, A.G., Korkut, S., Punckt, C., and Aksay, I.A. (2013a). Dispersion stability of functionalized graphene in aqueous sodium dodecyl sulfate solutions. *Langmuir* *29*, 14831-14838.
- Hsieh, A.G., Punckt, C., Korkut, S., and Aksay, I.A. (2013b). Adsorption of sodium dodecyl sulfate on functionalized graphene measured by conductometric titration. *J Phys Chem B* *117*, 7950-7958.
- Kasry, A., Ardakani, A.A., Tulevski, G.S., Menges, B., Copel, M., and Vyklicky, L. (2012). Highly Efficient Fluorescence Quenching with Graphene. *The Journal of Physical Chemistry C* *116*, 2858-2862.
- Kim, H.M., Choo, H.J., Jung, S.Y., Ko, Y.G., Park, W.H., Jeon, S.J., Kim, C.H., Joo, T., and Cho, B.R. (2007). A two-photon fluorescent probe for lipid raft imaging: C-laurdan. *ChemBiochem* *8*, 553-559.
- Kreutzberger, Alex J.B., Kiessling, V., and Tamm, Lukas K. (2015). High Cholesterol Obviates a Prolonged Hemifusion Intermediate in Fast SNARE-Mediated Membrane Fusion. *Biophysical Journal* *109*, 319-329.
- Levental, I., Byfield, F.J., Chowdhury, P., Gai, F., Baumgart, T., and Janmey, P.A. (2009). Cholesterol-dependent phase separation in cell-derived giant plasma-membrane vesicles. *Biochem J* *424*, 163-167.
- Li, N., Zhang, X., Song, Q., Su, R., Zhang, Q., Kong, T., Liu, L., Jin, G., Tang, M., and Cheng, G. (2011). The promotion of neurite sprouting and outgrowth of mouse hippocampal cells in culture by graphene substrates. *Biomaterials* *32*, 9374-9382.
- Li, Y., Yuan, H., von dem Bussche, A., Creighton, M., Hurt, R.H., Kane, A.B., and Gao, H. (2013a). Graphene microsheets enter cells through spontaneous membrane penetration at edge asperities and corner sites. *Proc Natl Acad Sci U S A* *110*, 12295-12300.
- Li, Z., Wang, Y., Kozbial, A., Shenoy, G., Zhou, F., McGinley, R., Ireland, P., Morganstein, B., Kunkel, A., Surwade, S.P., *et al.* (2013b). Effect of airborne contaminants on the wettability of supported graphene and graphite. *Nat Mater* *12*, 925-931.
- Liao, J.K., and Laufs, U. (2005). Pleiotropic effects of statins. *Annual review of pharmacology and toxicology* *45*, 89-118.
- Lingwood, D., and Simons, K. (2010). Lipid rafts as a membrane-organizing principle. *Science* *327*, 46-50.
- Lotya, M., Hernandez, Y., King, P.J., Smith, R.J., Nicolosi, V., Karlsson, L.S., Blighe, F.M., De, S., Wang, Z., McGovern, I.T., *et al.* (2009). Liquid phase production of graphene by exfoliation of graphite in surfactant/water solutions. *J Am Chem Soc* *131*, 3611-3620.
- Mao, H.Y., Laurent, S., Chen, W., Akhavan, O., Imani, M., Ashkarran, A.A., and Mahmoudi, M. (2013). Graphene: Promises, Facts, Opportunities, and Challenges in Nanomedicine. *Chem Rev* *113*, 3407-3424.

- Mauch, D.H., Nägler, K., Schumacher, S., Göritz, C., Müller, E.-C., Otto, A., and Pfrieder, F.W. (2001). CNS Synaptogenesis Promoted by Glia-Derived Cholesterol. *Science* 294, 1354-1357.
- Maxfield, F.R., and Tabas, I. (2005). Role of cholesterol and lipid organization in disease. *Nature* 438, 612-621.
- N, D.A., and Volonte, C. (2013). Metabotropic purinergic receptors in lipid membrane microdomains. *Curr Med Chem* 20, 56-63.
- Novoselov, K.S., Geim, A.K., Morozov, S.V., Jiang, D., Zhang, Y., Dubonos, S.V., Grigorieva, I.V., and Firsov, A.A. (2004). Electric field effect in atomically thin carbon films. *Science* 306, 666-669.
- O'Connell, M.J., Bachilo, S.M., Huffman, C.B., Moore, V.C., Strano, M.S., Haroz, E.H., Rialon, K.L., Boul, P.J., Noon, W.H., Kittrell, C., *et al.* (2002). Band Gap Fluorescence from Individual Single-Walled Carbon Nanotubes. *Science* 297, 593-596.
- Oates, J., and Watts, A. (2011). Uncovering the intimate relationship between lipids, cholesterol and GPCR activation. *Curr Opin Struct Biol* 21, 802-807.
- Pike, L.J. (2006). Rafts defined: a report on the Keystone Symposium on Lipid Rafts and Cell Function. *Journal of lipid research* 47, 1597-1598.
- Sahni, D., Jea, A., Mata, J.A., Marcano, D.C., Sivaganesan, A., Berlin, J.M., Tatsui, C.E., Sun, Z., Luerssen, T.G., Meng, S., *et al.* (2013). Biocompatibility of pristine graphene for neuronal interface. *J Neurosurg Pediatr* 11, 575-583.
- Sezgin, E., Kaiser, H.-J., Baumgart, T., Schwille, P., Simons, K., and Levental, I. (2012). Elucidating membrane structure and protein behavior using giant plasma membrane vesicles. *Nat Protocols* 7, 1042-1051.
- Simons, K., and Ehehalt, R. Cholesterol, lipid rafts, and disease. *The Journal of Clinical Investigation* 110, 597-603.
- Simons, K., and Gerl, M.J. (2010). Revitalizing membrane rafts: new tools and insights. *Nat Rev Mol Cell Biol* 11, 688-699.
- Simons, K., and Toomre, D. (2000). Lipid rafts and signal transduction. *Nat Rev Mol Cell Biol* 1, 31-39.
- Singer, S.J., and Nicolson, G.L. (1972). The fluid mosaic model of the structure of cell membranes. *Science* 175, 720-731.
- Subtil, A., Gaidarov, I., Kobylarz, K., Lampson, M.A., Keen, J.H., and McGraw, T.E. (1999). Acute cholesterol depletion inhibits clathrin-coated pit budding. *Proc Natl Acad Sci U S A* 96, 6775-6780.
- Tu, Y., Lv, M., Xiu, P., Huynh, T., Zhang, M., Castelli, M., Liu, Z., Huang, Q., Fan, C., Fang, H., *et al.* (2013). Destructive extraction of phospholipids from Escherichia coli membranes by graphene nanosheets. *Nat Nanotechnol* 8, 594-601.
- Vance, J.E., and Karten, B. (2014). Niemann-Pick C disease and mobilization of lysosomal cholesterol by cyclodextrin. *Journal of lipid research* 55, 1609-1621.
- Wang, Y., Lee, W.C., Manga, K.K., Ang, P.K., Lu, J., Liu, Y.P., Lim, C.T., and Loh, K.P. (2012). Fluorinated Graphene for Promoting Neuro-Induction of Stem Cells. *Adv Mater* 24, 4285-4290.
- Yeagle, P.L. (1985). Cholesterol and the cell membrane. *Biochimica et Biophysica Acta (BBA) - Reviews on Biomembranes* 822, 267-287.
- Yeagle, P.L. (2014). Non-covalent binding of membrane lipids to membrane proteins. *Biochimica et Biophysica Acta (BBA) - Biomembranes* 1838, 1548-1559.

- Zhang, L., Xu, B., and Wang, X. (2016). Cholesterol Extraction from Cell Membrane by Graphene Nanosheets: A Computational Study. *The Journal of Physical Chemistry B*.
- Zhang, Q., Cao, Y.-Q., and Tsien, R.W. (2007). Quantum dots provide an optical signal specific to full collapse fusion of synaptic vesicles. *Proceedings of the National Academy of Sciences* *104*, 17843-17848.
- Zhang, Q., Li, Y., and Tsien, R.W. (2009). The Dynamic Control of Kiss-And-Run and Vesicular Reuse Probed with Single Nanoparticles. *Science* *323*, 1448-1453.
- Zhang, Q., Pangrsic, T., Kreft, M., Krzan, M., Li, N.Z., Sul, J.Y., Halassa, M., Van Bockstaele, E., Zorec, R., and Haydon, P.G. (2004). Fusion-related release of glutamate from astrocytes. *Journal of Biological Chemistry* *279*, 12724-12733.
- Zidovetzki, R., and Levitan, I. (2007). Use of cyclodextrins to manipulate plasma membrane cholesterol content: evidence, misconceptions and control strategies. *Biochim Biophys Acta* *1768*, 1311-1324.

1 **Supplementary Materials:**

2 **Materials and Methods:**

3 **Preparation and Characterization of Suspended Graphene Nanoflake (GNF) Solutions.** The

4 GNF suspension was prepared by liquid exfoliation of graphite powder. Graphite powder was

5 purchased from ASBURY CARBONS (Grade: 2299). Polyvinylpyrrolidone (PVP, MW:

6 1,300,000 g/mol) was purchased from Sigma. Hydrophobic graphite powder was added into 2 wt%

7 PVP or 1 wt% SDS (sodium dodecyl sulfate) water solution and sonicated for 9 h in a bath

8 sonicator<sup>1</sup>. The uniform GNF suspension was then centrifuged with a Thermo Scientific Fiberlite

9 F15-6 X100y rotor at 4,000 rpm and at room temperature for 1 h to sediment large graphite

10 aggregates. The upper 50% of supernatant was carefully decanted, resulting in PVP-functionalized

11 GNF suspension<sup>2,3</sup>. The transmission characterization of GNF suspension was carried out on a

12 Varian Cary 5000 UV-VIS-NIR spectrophotometer. The concentration of GNF was estimated with

13 an absorption coefficient of 2460 L g<sup>-1</sup> m<sup>-1</sup> at 660 nm<sup>2</sup>, which is typically 26 mg/L for freshly-

14 made GNF suspension. The suspension is stored in 4 °C and remain stable for more than a year.

15 As shown in Figure 1, a one-year old GNF suspension (*left*) shows no precipitation and evenly-

16 distributed as that of a freshly-prepared one (*right*).

17

18 **Characterization of GNFs.** The GNF suspension was characterized using transmission electron

19 microscopy (TEM). TEM samples were prepared by drop casting a small volume (~ 2 µl) of GNF

20 suspension onto carbon grids (300 mesh size, Ted Pella). The samples were air dried for 2 h, and

21 then rinsed with DI water to remove excessive solvent. Bright field TEM images of the typically

22 observed GNFs were taken by an Osiris TEM at an accelerating voltage of 200 kV. Raman

23 spectroscopy was also employed to characterize the quality of the GNFs. The GNFs were drop-

1 casted onto an Si/SiO<sub>2</sub> wafer (300 nm SiO<sub>2</sub>) and then washed with DI water to remove excess  
2 suspension agents. The Raman spectra were taken by a DXR Raman microscope (Thermo  
3 Scientific) with 532 nm laser excitation. The size and thickness of GNFs were further investigated  
4 by a Nanoscope III atomic force microscope (AFM). The GNF suspension was spin-coated onto a  
5 Si wafer with 300 nm SiO<sub>2</sub>, and washed with DI water to remove solvent residue. The AFM was  
6 operated in tapping mode with a typical image size of 2-5 μm.

7  
8 **Cell Culture.** For all experiments, rat postnatal hippocampal cultures were prepared as previously  
9 described<sup>4</sup>, with some modifications. Briefly, rat hippocampi (CA1-CA3) were dissected from P0  
10 or P1 Sprague-Dawley rats and dissociated into a single-cell suspension with a 10 min incubation  
11 in Trypsin-EDTA (Life Technologies) followed by gentle trituration using three glass pipettes of  
12 different diameters (~ 1 mm, 0.5 mm, and 0.2 mm), sequentially. Dissociated cells were recovered  
13 by centrifugation (x 200 g, 5 minutes) at 4 °C and re-suspended in plating media composed of  
14 Minimal Essential Medium (MEM, Life Technologies) with (in mM) 27 glucose, 2.4 NaHCO<sub>3</sub>,  
15 0.00125 transferrin, 2 L-glutamine, 0.0043 insulin and 10%/vol fetal bovine serum (FBS, Omega).  
16 100 μl of cell suspension was added onto round 12mm-Ø glass coverslips (200-300 cells/mm<sup>2</sup>)  
17 100 μl of Matrigel (BD Biosciences, 1:50 dilution) was deposited on the coverslips and incubated  
18 at 37°C with 5% CO<sub>2</sub> for ~ 2 h, then aspirated before cells were plated. Cells were allowed to settle  
19 on the coverslip surfaces for 4 h before the addition of 1 mL culture media made of MEM  
20 containing (in mM) 27 glucose, 2.4 NaHCO<sub>3</sub>, 0.00125 transferrin, 1.25 L-glutamine, 0.0022  
21 insulin, 1 %/vol B27 supplement (Life Technologies) and 7.5 %/vol FBS. 1 to 2 days after plating,  
22 2% Ara-C was introduced with another 1 mL of culture media, which efficiently prevented

1 astroglia proliferation. All procedures were in accordance with Vanderbilt University Institutional  
2 Animal Care and Use Committee standards.

3 NIH 3T3 cells were grown at 37°C with 5% CO<sub>2</sub> in Dulbecco's modified Eagle's medium  
4 containing 4.5 g/L glucose and L-glutamine supplemented with 10% fetal bovine serum, 100 units  
5 mL<sup>-1</sup> penicillin, and 100 µg mL<sup>-1</sup> streptomycin. Cells were regularly passaged to maintain adequate  
6 growth and were passaged at least 5 times before trypsinization and plating on the Matrigel-coated  
7 round 12mm-Ø glass coverslips (75 µL of 1-3 x 10<sup>6</sup> cell solution per coverslip). Cells were grown  
8 to 50-80% confluency for 24 h on coverslips prior to experiments.

9

10 **Cholesterol Assay.** An enzymatic assay (Amplex Red Cholesterol Assay Kit, Life Technologies)  
11 was used to quantify free cholesterol concentrations<sup>5</sup>. Briefly, a serial dilution of cholesterol  
12 standard was used to generate a calibration curve. Four different batches of hippocampal culture  
13 media were used. Aliquots of media were incubated with H<sub>2</sub>O, 0.002 wt% PVP in H<sub>2</sub>O, or 260  
14 ng/mL GNFs with 0.002 wt% PVP in H<sub>2</sub>O in 37°C and 5% CO<sub>2</sub> for 24 h. Graphene was separated  
15 from media using Amicon centrifugal filters (30 kDa, Millipore) and resuspended in H<sub>2</sub>O with  
16 0.002 wt% PVP. The flow-through media was collected. Media with H<sub>2</sub>O, media with PVP, or  
17 GNFs separated from media and flow-through media were assayed, and the fluorescence  
18 intensities of all enzymatic reaction products were measured using a spectofluorometer  
19 (FluoroMax-4, Horiba). Four independent measurements were performed for each sample and the  
20 cholesterol concentrations were calculated based on the calibration curve.

21

22 **Fluorescence lifetime measurements.** Fluorescence lifetime images were acquired using a  
23 custom-built multiphoton fluorescence system (Bruker) built on an inverted microscope (Nikon



1 Ti-E). For bulk solution measurements, 500  $\mu$ L sample volumes were illuminated using a 40x oil-  
2 immersion objective (N.A. 1.3). TFC (TopFluor Cholesterol) or BODIPY (boron-dipyrromethene)  
3 were added to suspended GNFs (26 ng/mL) or water at a final concentration of 1  $\mu$ M for 1 h prior  
4 to imaging. NIH-3T3 cell samples were illuminated using a 100x oil-immersion objective (N.A.  
5 1.45). For cell membrane experiments, graphene suspension (26 ng/ml) was added to cells in  
6 normal Tyrode for 10 min and then TFC was added at a final concentration of 1  $\mu$ M. Samples were  
7 excited with a Ti:Sapphire laser (Coherent, Inc.) tuned to 960 nm, passed through a 550/100  
8 emission filter, and detected using a GaAsP photomultiplier tube (H7422P-40, Hamamatsu). Pixel  
9 dwell time was 4.8  $\mu$ s and the acquired images were 256x256 pixels with a 60 s acquisition time  
10 at an average incident power of approximately 10 mW. Fluorescence lifetime images were  
11 acquired using time-correlated single photon counting electronics (SPC-150; Becker & Hickl).  
12 The instrument response function (IRF) was generated by measuring the second harmonic  
13 generation of urea crystals excited at 900 nm. The full width at half maximum of the IRF was 244  
14 ps. Fluorescence lifetime was validated before each experiment by imaging a fluorescent bead  
15 standard (Polysciences, Inc.). The measured lifetime of this bead was  $2.1 \pm 0.005$  ns (n=3), in good  
16 agreement with published values<sup>6</sup>. Phasor analysis was performed as described previously<sup>7</sup>, using  
17 Matlab algorithms based on a previously published algorithm<sup>8</sup>.

18  
19 **Giant plasma membrane vesicle preparation.** NIH-3T3 cells at greater than 85% confluency  
20 were washed 3 times with PBS and labeled at 5  $\mu$ g/ml for 10 min at 37°C with 1,1'-Dilinoleyl-  
21 3,3,3',3'-tetramethylindocarbocyanine,4-chlorobenzenesulfonate (FAST-DiI, C-18, Life  
22 Technologies). GPMV isolation was performed as previously described<sup>9</sup>. Briefly, cells were  
23 blebbed in deionized water containing, in mM: 10 HEPES, 150 NaCl, 2 CaCl<sub>2</sub>, pH 7.4, with 25

1 mM PFA and 2mM DTT at 37°C for 2-3 h. GPMVs were treated for either prior to or following  
2 vesiculation. For treatments prior to GPMV isolation, the supernatant was collected and allowed  
3 to settle for at least 1 hour at 4°C prior to imaging to allow GPMVs to settle. Three independent  
4 GPMV preparations were performed for each treatment duration and a minimum of 60 GPMVs  
5 were imaged for each individual temperature point.

6

7 **GPMV fluorescence imaging and lipid phase separation.** Lipid phase separation was achieved  
8 using a commercial liquid-nitrogen cooled temperature stage equipped with two heating elements  
9 (GS350, Linkam Scientific Instruments). Thermal grease (Linkam) was applied to stage surfaces  
10 for each sample to minimize thermal contact resistance and maximize conductive heat transfer.  
11 Samples were allowed to equilibrate for 1 min at each temperature point prior to image acquisition.  
12 Images were acquired with a 60X LUMPlanFl Olympus water-immersion objective (N.A. 0.9)  
13 on a customized spinning disk confocal setup built on an Olympus BX-51WI microscope with a  
14 CSU-X1 (Yokogawa) spinning disk head and an Evolve 512 EMCCD (Photometrics). Samples  
15 were visualized with a 561 nm laser (Coherent) and an Em 605/52 filter set. Image analysis was  
16 performed in Matlab using custom-written algorithms.

17

18 **Generalized polarization image analysis.** Similar to previous report <sup>10</sup>, cells were pre-incubated  
19 with culture media containing 1  $\mu$ M C-laurdan (TP Probes) at 37°C and 5% CO<sub>2</sub> for 1 h. Loaded  
20 cells were imaged using a Nikon Ti-E equipped with an iX897 EMCCD (Andor) and a 100X  
21 ApoVC objective (N.A. 1.40). Cells on coverslips were mounted in an RC-26G imaging chamber  
22 (Warner Instruments) bottom-sealed with a 24X40 mm size 0 cover glass (Fisher Scientific). The  
23 chamber was fixed in a PH-1 platform (Warner Instruments) placed on the microscope stage. The

1 temperatures of both the imaging chamber and the constant perfusion (~50  $\mu\text{L}/\text{sec}$ ) solution were  
2 maintained at 34°C by a temperature controller (TC344B, Warner Instruments). A filter  
3 combination of D350x for excitation and a DiC 409LP with an Em 440/40 or 483/32 (for blue or  
4 green channels, respectively) were used. Image acquisition and synchronized perfusion were  
5 controlled via Micro-manager software. Images were post-processed in ImageJ using the following  
6 formula:  $I_{\text{GP}} = (I_{\text{blue}} - G \times I_{\text{green}}) / (I_{\text{blue}} + G \times I_{\text{green}})$ , in which G is the sensitivity correction factor between  
7 the two channels<sup>11</sup>. G was empirically determined by imaging 1  $\mu\text{M}$  C-laurdan diluted in DMSO  
8 using the standard protocol. Given  $\text{GP}_{\text{DMSO}} = 0.006$ , the G value of our imaging setup was  
9 calculated using the following formula:  $G = (I_{\text{blue}} \times (1 - \text{GP}_{\text{DMSO}})) / (I_{\text{green}} \times (1 + \text{GP}_{\text{DMSO}}))$ .

10

11 **Folch Extraction.** 500  $\mu\text{L}$  and 250  $\mu\text{L}$  of 5% HCl were added to cells and to 250  $\mu\text{L}$  of media,  
12 respectively. 750  $\mu\text{L}$  of Folch solution (2:1,  $\text{CHCl}_3$ :MeOH with 17 mg/L BHT, butylated  
13 hydroxytoluene) was utilized for extraction and 10  $\mu\text{L}$  of 1.25 mg/mL 5 $\beta$ -cholestan-3 $\alpha$ -ol was  
14 added as an internal standard for cholesterol quantitation. The Folch solution was vortexed and  
15 centrifuged briefly to allow distinct organic and aqueous layers to separate. The organic layer was  
16 then used for cholesterol identification and quantification (GC-FID, Gas chromatography – Flame  
17 ionization detector, and GC-MS, Gas chromatography – Mass spectrometry).

18

19 **Cholesterol derivatization.** Folch extractions from both cells and media were dried down and  
20 reconstituted in 40  $\mu\text{L}$  of bistrimethylsilyltrifluoroacetamide (BSTFA) kit solution (Sigma-  
21 Aldrich) for at least 2 h with internal standard to account for extraction and derivatization  
22 efficiencies.

23

1 **Gas chromatography – Flame ionization detector (GC-FID).** Cholesterol quantification was  
2 carried out in duplicates for all biological replicates with a GC-6890 gas chromatograph (Hewlett-  
3 Packard) equipped with a DB-5 (30 mm × 0.32 mm × 0.25 mm) fused silica column (Sigma  
4 Aldrich). Briefly, sterols were separated using a temperature program as follows: samples were  
5 heated from 220 to 275 °C at 15 °C/min, then further heated to 280 °C at 1 °C/min and maintained  
6 for 2 min, followed by heating to 290 °C at 5 °C/min rate and holding for 10 min.

7  
8 **Determination of total protein content.** Proteins separated during Folch extraction were MeOH  
9 washed, pelleted, and dried before re-suspension in 2% SDS (Sigma Aldrich). A Pierce BCA assay  
10 (Life Technologies) was performed according to manufacturer specifications using 25 µL of  
11 protein sample per microwell. Sample absorption was measured at 560 nm using a Glomax  
12 Discover (Promega) 96-well microplate reader.

13  
14 **Filipin Staining.** Cells were fixed in PBS containing 4% paraformaldehyde for 1 h, washed with  
15 PBS, and incubated with filipin (1:500 in PBS, Sigma-Aldrich). For whole cell staining, cells were  
16 incubated with filipin for 2 h at room temperature. For membrane staining, cells were incubated  
17 with filipin for 30 min at 4 °C to minimize membrane penetration. Fluorescence imaging was  
18 performed on an Olympus IX-81 inverted microscope using an Olympus PlanSApo 20X objective  
19 (N.A. 0.75) with a fluorescence filter set (Ex 390/40, DiC T425LPXR, Em 460/50, Semrock).  
20 Images were acquired with an EMCCD (Andor) via Micro-manager with the same acquisition  
21 settings (excitation light intensity, exposure time and gain) across all samples. For analysis, three  
22 independent batches of cultures and at least three cells for every group were analyzed (n > 9

1 different coverslips). Image analysis was performed in both ImageJ and Matlab using custom-  
2 written algorithms.

3

4 **Fluorescence imaging and analysis.** All live cell imaging was performed using the spinning disk  
5 confocal setup used for GPMV imaging. Cells on coverslips were mounted in an RC-26G imaging  
6 chamber (Warner Instruments) bottom-sealed with a 24X40 mm size 0 cover glass (Fisher  
7 Scientific). The chamber was fixed in a PH-1 platform (Warner Instruments) placed on the  
8 microscope stage. Gravity perfusion was controlled by a VC-6 valve control system (Warner  
9 Instruments) with a constant rate of ~50  $\mu\text{L}/\text{sec}$ . All perfusion lines were combined into an SHM-  
10 6 in-line solution heater (Warner Instruments). The temperatures of both the imaging chamber and  
11 the perfusion solution were maintained at 34°C by a temperature controller (TC344B, Warner  
12 Instruments). Image acquisition and synchronized perfusion were controlled via Micro-manager  
13 software.

14 For TFC loading, cells were pre-incubated in culture media containing 1  $\mu\text{M}$  TFC at 37° C with  
15 5%  $\text{CO}_2$  for 20 min. For DiO imaging, cells were pre-loaded with 10  $\mu\text{M}$  DiO (Invitrogen) in  
16 culture media at 37°C with 5%  $\text{CO}_2$  for 15 min. For voltage imaging, the DiO containing solution  
17 was replaced with 20 mM DPA (dipicrylamine) in normal Tyrode. For  $\text{Ca}^{2+}$  imaging, cells were  
18 pre-incubated with culture media containing 10  $\mu\text{M}$  XRhod-1AM (Life Technologies) at 37°C  
19 with 5%  $\text{CO}_2$  for 30 min. For FM dye or Quantum dot (Qdot) loading of the evoked pool of  
20 synaptic vesicles, cells were incubated with 10  $\mu\text{M}$  FM1-43 or FM4-64, or 100 or 0.8 nM Qdots  
21 (Qdot 605, Life Technologies) for 2 min in high  $\text{K}^+$  bath solution containing (in mM): 64 NaCl,  
22 90 KCl, 2  $\text{MgCl}_2$ , 2  $\text{CaCl}_2$ , 10 N-2 hydroxyethyl piperazine-n-2 ethanesulphonic acid (HEPES),  
23 10 glucose, 1  $\mu\text{M}$  TTX, pH 7.35. After loading, cells were washed with normal bath solution

1 containing 10  $\mu$ M NBQX (2,3-dihydroxy-6-nitro-7-sulfamoylbenzo[f]quinoxaline-2,3-dione) and  
2 20  $\mu$ M D-AP5 (D-(-)-2-Amino-5-phosphonopentanoic acid ) for at least 10 min prior to imaging.  
3 For TFC, FM1-43 and DiO/DPA imaging, a 480 nm laser (Coherent) and a filter combination of  
4 DiC 500LX and Em 520/20 were used. For  $\text{Ca}^{2+}$  imaging, a 561 nm laser (Coherent) and a filter  
5 combination of DiC 580LPXR and Em 605/52 were used. For Qdot imaging, a 480 nm laser and  
6 a filter combination of DiC 510LX and Em 605/10 were used. For FM4-64 imaging, a 561 nm  
7 laser (Coherent) and a filter combination of DiC 600LX and Em 620/20 were used. All optical  
8 filters and dichroic mirrors were purchased from Chroma or Semrock. The acquisition rate was 5  
9 Hz for Qdots and 1 Hz for all other dyes. For each dye, images were taken with the same acquisition  
10 settings (excitation light intensity, spinning disk speed, exposure time, and EM gain) for all  
11 samples. All image analyses were performed in ImageJ as described previously<sup>12</sup>. To obtain mean  
12 Qdot photoluminescence intensities in each synaptic bouton across all fields of view, all ROIs  
13 defined by retrospective FM4-64 staining of the same field of view were projected to an average  
14 image made from the first ten frames of the Qdot image stack. Quantal analysis for single Qdot  
15 loading was applied as described before<sup>12</sup>. To analyze the behavior of vesicles labeled by single  
16 Qdots, we selected ROIs having only one Qdot. Time-dependent Qdot photoluminescence changes  
17 were extracted with a 5-frame moving window. All data were exported and processed in Excel,  
18 Matlab, and SigmaPlot.

19

20 **Electrophysiology.** Whole-cell voltage clamp recordings were performed on neurons from 12 -  
21 18 DIV cultures using a Multi-Clamp 700B amplifier, digitized through a Digidata 1440A, and  
22 interfaced via pCLAMP 10 software (all from Molecular Devices). All recordings were performed  
23 at room temperature. Cells were voltage clamped at -70 mV for all experiments. Patch pipettes

1 were pulled from borosilicate glass capillaries with resistances ranging from 3 - 6 M $\Omega$  when filled  
2 with pipette solution. The bath solution (Tyrode's saline) contained (in mM): 150 NaCl, 4 KCl, 2  
3 MgCl<sub>2</sub>, 2 CaCl<sub>2</sub>, 10 HEPES, 10 glucose, pH 7.35. The pipette solution contained (in mM): 120  
4 Cesium Methanesulfonate, 8 CsCl, 1 MgCl<sub>2</sub>, 10 HEPES, 0.4 EGTA, 2 MgATP, 0.3 GTP-Tris, 10  
5 phosphocreatine, QX-314 (50  $\mu$ M), 5 biocytin (Tocris), pH 7.2. For the recordings of mEPSCs,  
6 bath solution was supplied with 1  $\mu$ M tetrodotoxin (TTX, Abcam). The last 50 mEPSCs at the end  
7 of 5 min recordings with TTX were collected and analyzed using a template based event detection  
8 feature of Clampfit 10.2 software. The template was generated by averaging a collection of  
9 representative mEPSC events. To measure AMPA receptor currents, D-AP5 (Abcam), an NMDA  
10 receptor antagonist, was added to the bath solution. NMDA receptor currents were recorded in the  
11 presence of 10  $\mu$ M NBQX (Abcam), an AMPA receptor antagonist, in 0 mM [Mg<sup>2+</sup>] / 3 mM [Ca<sup>2+</sup>]  
12 bath solution at -70 mV holding potential. Isolated AMPA and NMDA EPSCs were recorded from  
13 the same neurons sequentially by first applying D-AP5 then completely replacing it with NBQX.  
14 The  $I_{\text{NMDAR}}/I_{\text{AMPA}}$  ratio for every neuron was calculated from the average amplitudes of the last  
15 10 NMDA and AMPA events during 5 min D-AP5 or subsequent NBQX application. No  
16 postsynaptic currents were detected if D-AP5 and NBQX were applied together. All signals were  
17 digitized at 20 kHz, filtered at 2 kHz, and analyzed offline with Clampfit software (Molecular  
18 Devices). All data were exported to and processed in Microsoft Excel.

19

20 **Data Analysis.** All experiments were carried out blindly and repeated in at least three different  
21 batches. All values presented are mean  $\pm$  s.e.m. For calculating statistics, the Student's *t*-test was  
22 used for 2-group comparison of average values, and one-way analysis of variance (ANOVA) and  
23 the Tukey-Kramer method as *post-hoc* analysis were used for 3 or more groups. Fisher *z*-tests were

- 1 used to compare correlation coefficients. 2-sided *Kolmogorov-Smirnov* tests were used to test for
- 2 equivalent distributions.



1 **Supplementary Results:**

2 **Graphene nanoflakes have a limited impact on the electric properties of the cell membrane**

3 Given the high charge carrier mobility of GNFs, they may change the electrical properties of the  
4 plasma membrane (e.g. conductance and excitability) when it attaches to or inserts. However, our  
5 results exclude this possibility. First, recordings of neuronal mEPSCs in synaptically matured  
6 neurons showed no significant difference in their amplitude between the GNF-treated and PVP-  
7 treated groups (Fig.S9). Second, we monitored neuronal membrane potential changes using an  
8 optical measurement, in which dipicrylamine (DPA, a small lipophilic anion) quenches membrane-  
9 embedded DiO upon depolarization<sup>13</sup>. The presence of GNFs did not cause any significant  
10 changes in 90 mM K<sup>+</sup>-induced neuronal depolarization (Fig. S2b), suggesting that GNFs did not  
11 affect neuronal membrane conductance or excitability. Third, we recorded I-V curves of 3T3 cells  
12 in the presence of GNFs or PVP control. There was no significant difference between the GNFs  
13 and PVP control groups in terms of membrane conductance (Fig. S7), suggesting that GNFs  
14 neither breaks cell membrane nor changes ion conductance of the plasma membrane. Together,  
15 these data suggest that, although it may insert into the plasma membrane, GNFs does not  
16 compromise membrane integrity or its electrophysiological properties.

17

18 **P2Y receptors mediate ATP-triggered intracellular release of Ca<sup>2+</sup> from internal stores**

19 Purinergic receptors, including P1 receptors for adenosine and P2 receptors for ATP, are a large  
20 family of transmembrane membrane proteins found in almost all mammalian cell types. P2  
21 receptors can be further divided into two subclasses, P2X (ionotropic receptors, P2XRs, members  
22 of ligand-gated ion channels) and P2Y (metabotropic receptors, P2YRs, members of G protein-  
23 coupled receptors)<sup>14</sup>. Using Ca<sup>2+</sup>-imaging with a red fluorescence Ca<sup>2+</sup> indicator (XRhod1-AM)

1 in NIH-3T3 cells, we found that a 1-min 100- $\mu$ M ATP application elicited a surge of cytosolic  
2  $\text{Ca}^{2+}$  and the same ATP stimulus 1 min later generated a second  $\text{Ca}^{2+}$ -response smaller than the  
3 first. Both responses were blocked by Suramin (antagonist for P2X and P2Y receptors) (Fig. S6a),  
4 suggesting that P2 receptors are the major purinergic receptors mediating this ATP-induced  
5 intracellular  $\text{Ca}^{2+}$  increase.

6  
7 Although both can be activated by extracellular ATP, P2XRs and P2YRs produce cytosolic  $\text{Ca}^{2+}$   
8 surges via different pathways: P2XRs are ionotropic receptors, allowing the influx of extracellular  
9  $\text{Ca}^{2+}$  upon ATP-binding, and P2YRs are metabotropic receptors that trigger the release of  $\text{Ca}^{2+}$   
10 from internal stores after ATP-binding<sup>15</sup>. The fact that the second  $\text{Ca}^{2+}$ -response was always  
11 smaller than the first suggested that the source of  $\text{Ca}^{2+}$  was unlikely extracellular  $\text{Ca}^{2+}$  (external  
12  $[\text{Ca}^{2+}]$  is constant and the reactivation time for P2XRs is much shorter than 1 minute) but rather  
13 internal  $\text{Ca}^{2+}$  stores, which require more than a minute to be fully refilled<sup>16</sup>. This notion is  
14 supported by the following empirical evidence. When we prohibited the refill of internal  $\text{Ca}^{2+}$   
15 stores by removing extracellular  $\text{Ca}^{2+}$  using 0  $\text{Ca}^{2+}$ /EGTA Tyrode's solution, the second ATP-  
16 induced  $\text{Ca}^{2+}$ -response diminished (Fig. S6a), suggesting a P2YR-mediated pathway involving  
17 internal  $\text{Ca}^{2+}$ -store. Furthermore, the fact that ATP failed to evoke any detectable inward current  
18 (Fig. S6b) disputes the involvement of ionotropic P2XRs in 3T3 cells. Thus, we conclude that  
19 P2YRs are the dominant mediator for the ATP-induced  $\text{Ca}^{2+}$  response in 3T3 cells.

### Supplementary Figures and Legends:

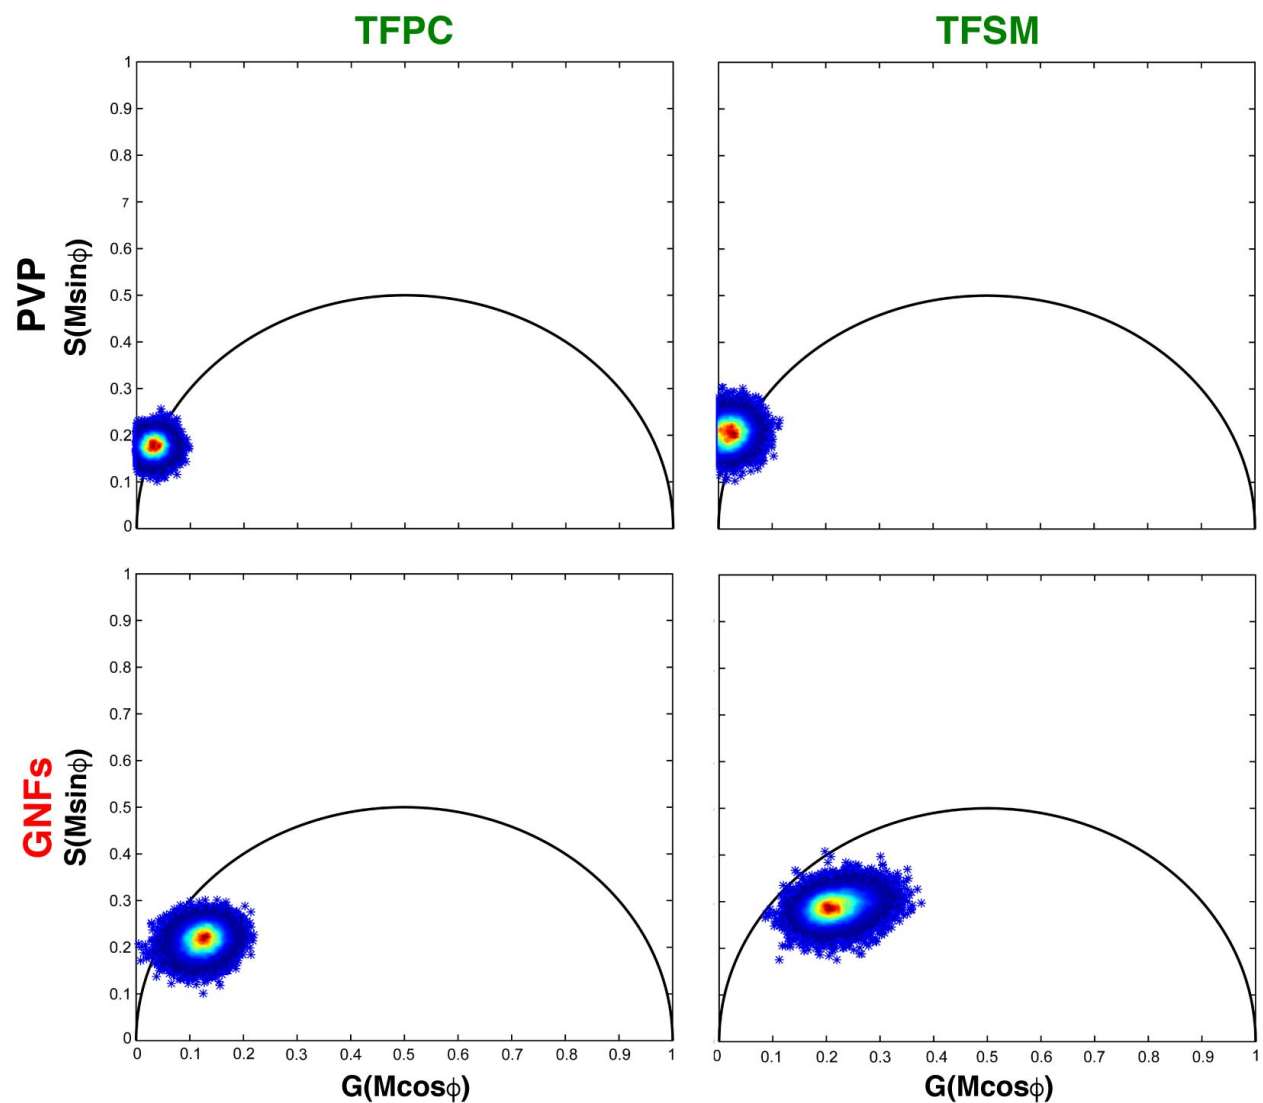

**Figure S1. Fluorescence lifetimes of TFPC and TFSM are minimally affected by GNFS.**

Phasor plots of TFPC and TFSM mixed with PVP or GNFS. TFPC, TopFluor Phosphocholine, TFSM, TopFluor Sphingomyelin.

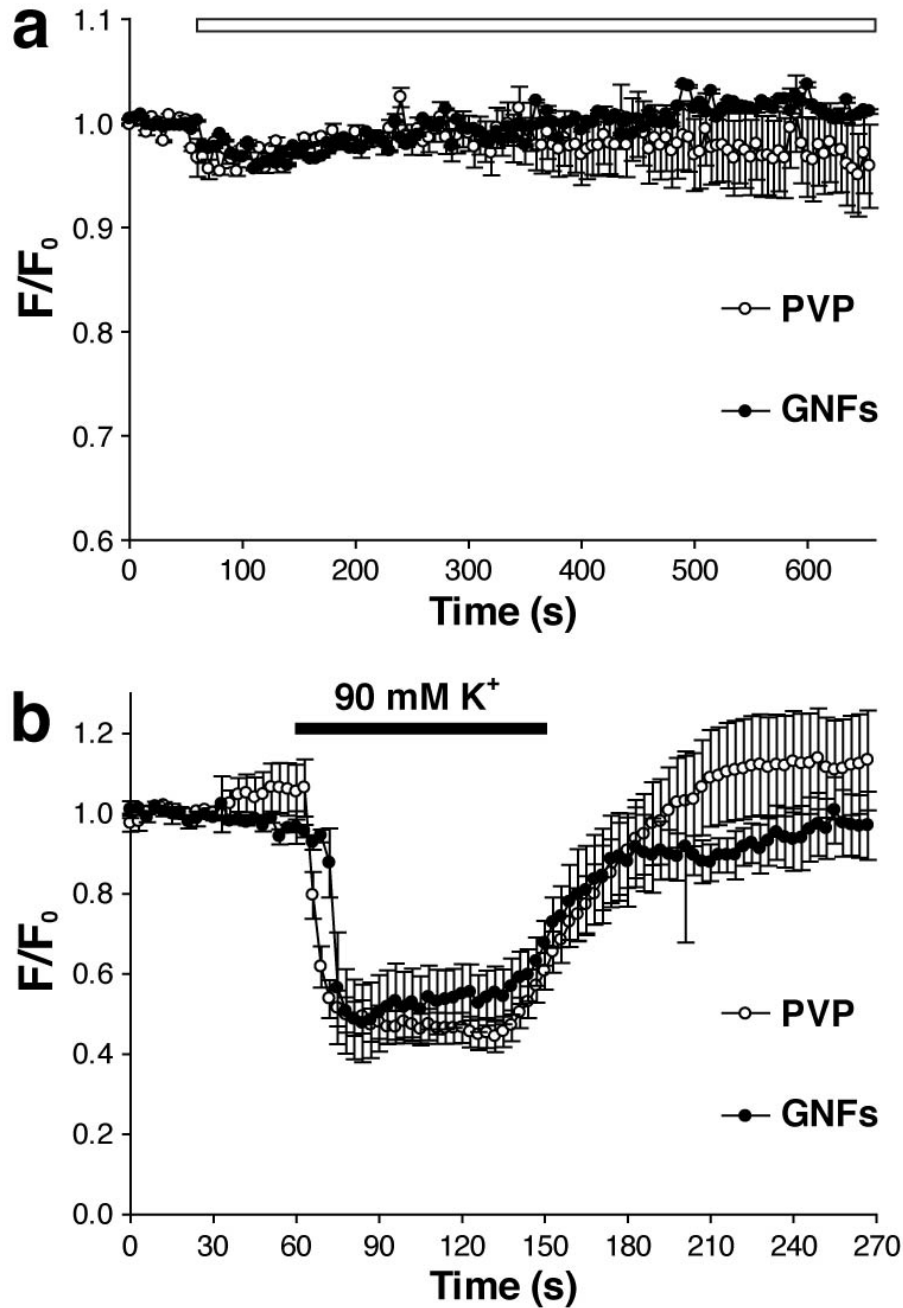

**Figure S2. Acute application of GNFs does not affect DiO fluorescence or its voltage sensing capabilities. (a)** Effect of PVP or GNFs (white bar, starting at 60s and lasting 600s) on DiO fluorescence (both  $n = 5$  replicates;  $p > 0.1$ ). **(b)** Decrease in DiO fluorescence (when paired with DPA) induced by 90 mM  $K^+$  for 5 min application of PVP or GNFs (both  $n = 5$  replicates;  $p > 0.05$ ).

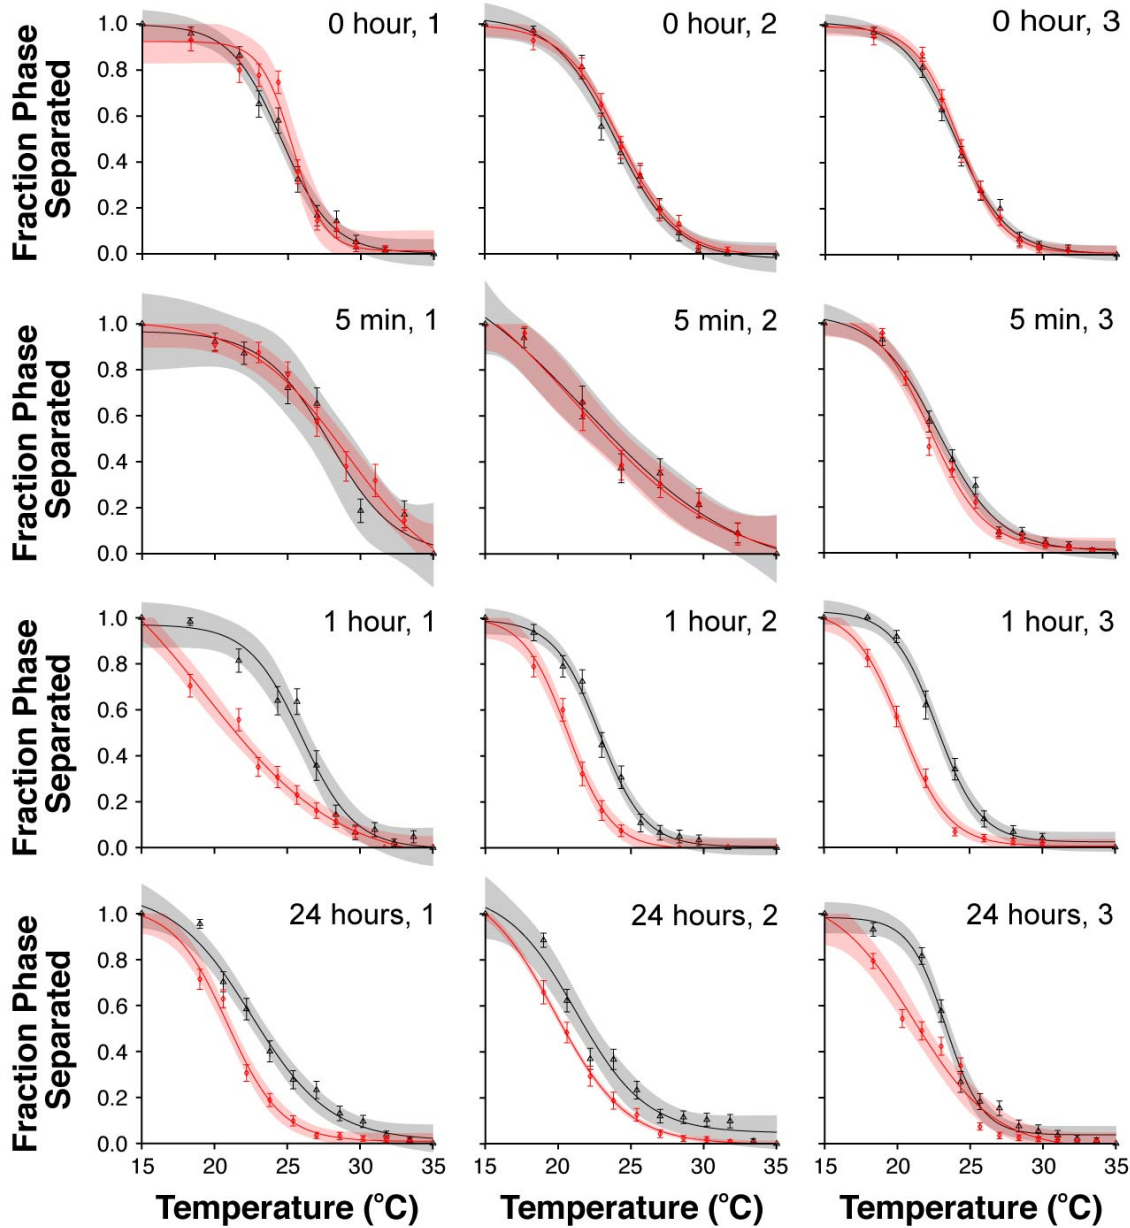

**Figure S3. Application of GNFs prior to GPMV isolation reduces miscibility temperature.**

Phase separation of 3T3 cells pre-incubated with media containing either PVP (black) or GNFs (red). Phase separated fractions were calculated from the total numbers of phase-separated and non-separated GPMVs at each temperature point. Areas of light shading show the 95% confidence

interval on the sigmoidal fit function, defined as:  $f(x) = A + B * \left( 1 - \frac{1}{1 + e^{-\frac{x-C}{D}}} \right)$ .

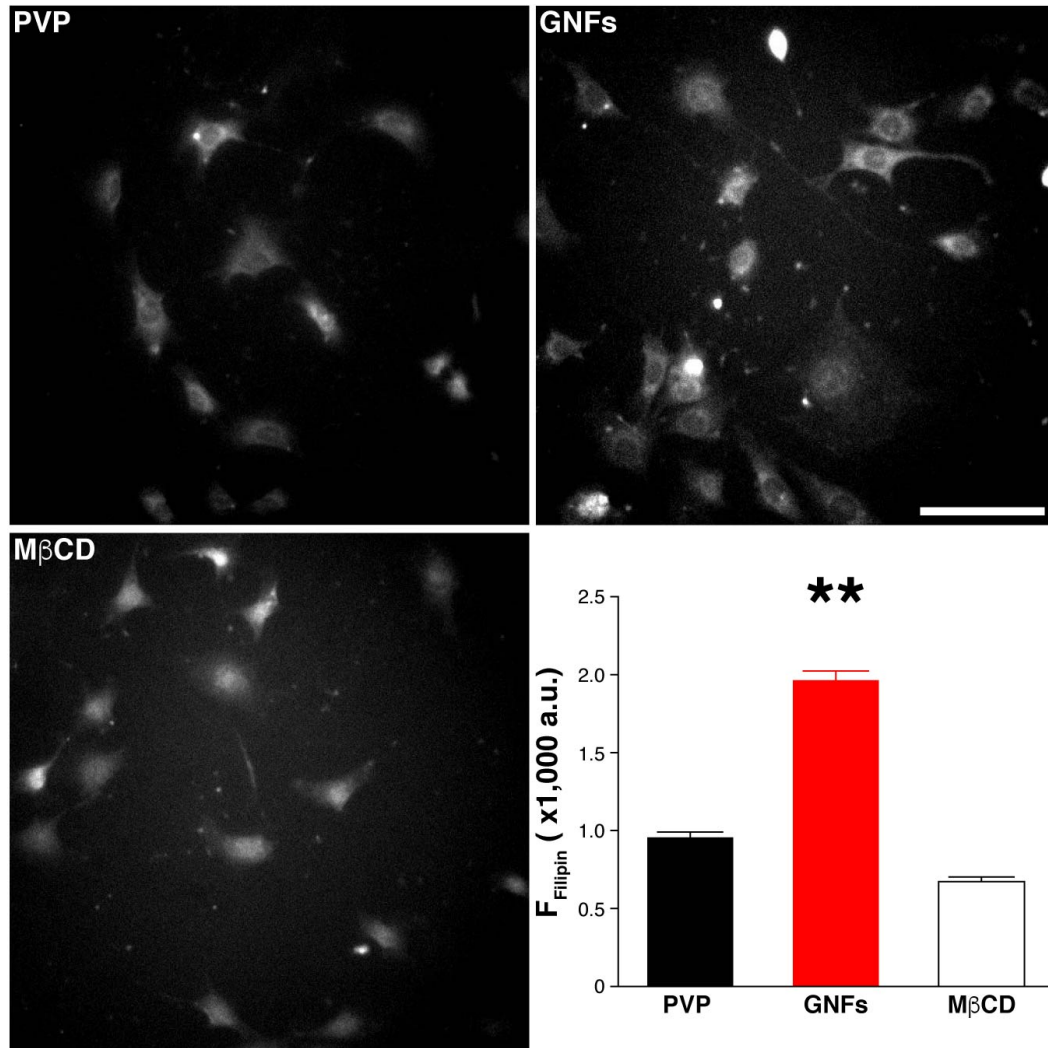

**Figure S4. Filipin staining shows GNF-induced cell surface cholesterol increase.** Scale bar, 100  $\mu\text{m}$ ;  $n = 9$  replicates. **\*\*** $p < 0.01$ . Error bars represent the S.E.M.

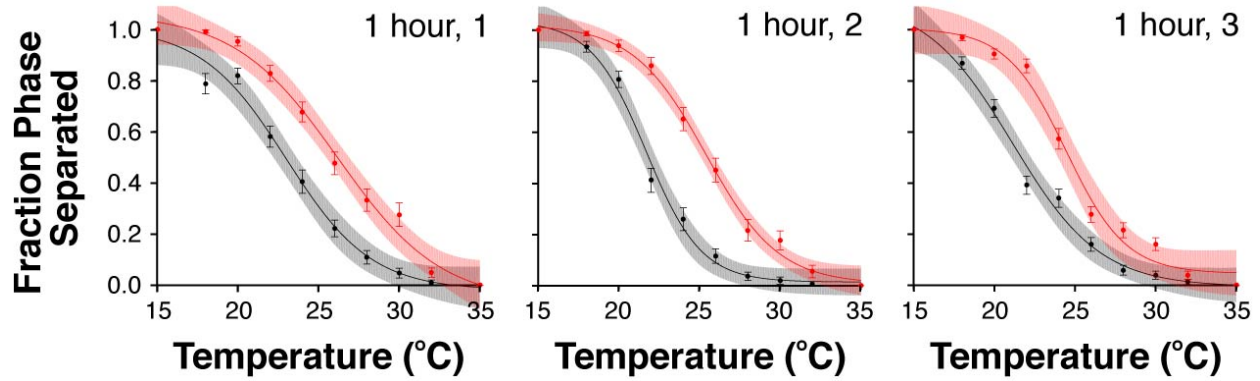

**Figure S5. 1-hour application of GNFs after GPMV isolation increases miscibility temperature.** Phase separation of isolated GPMVs treated with either PVP (black) or GNFs (red) for 1 h. Phase separated fractions were calculated from the total numbers of phase-separated and non-separated GPMVs at each temperature point. Areas of light shading show the 95% confidence

interval on the sigmoidal fit function, defined as:  $f(x) = A + B * \left(1 - \frac{1}{1 + e^{-\frac{x-C}{D}}}\right)$ .

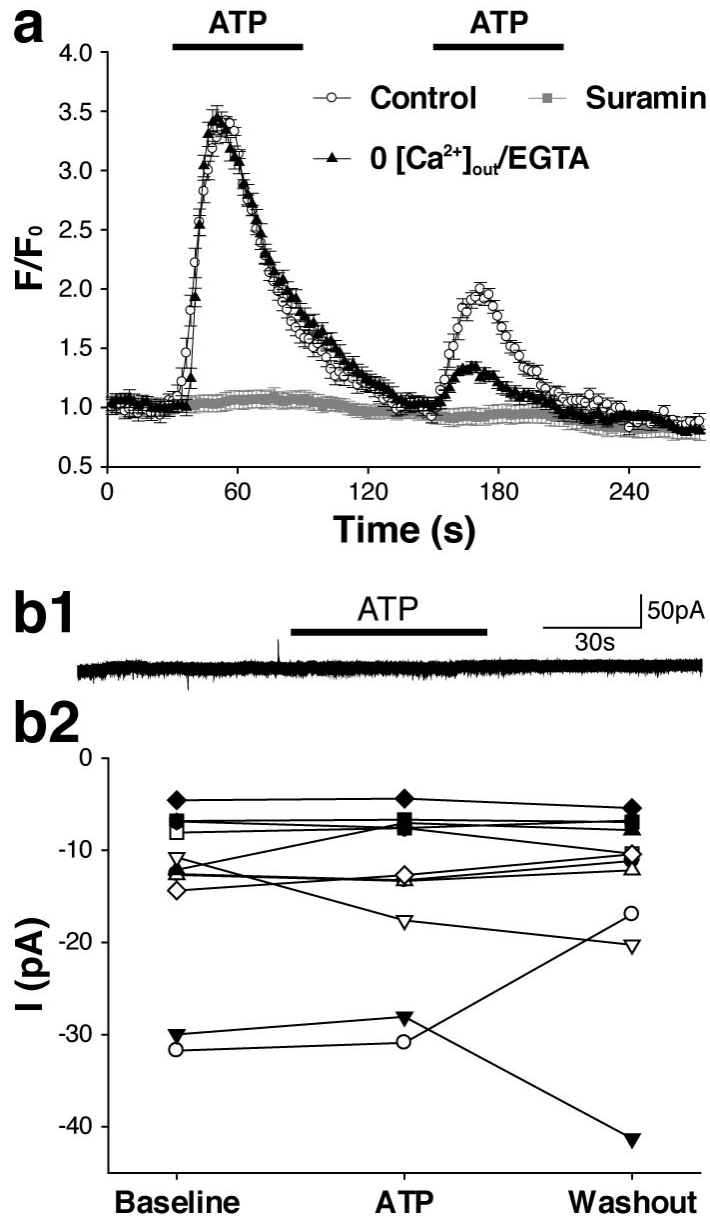

**Figure S6. P2YRs mediate ATP-induced Ca<sup>2+</sup>-release from internal Ca<sup>2+</sup>-store. (a)** Average Ca<sup>2+</sup>-response upon 100µM ATP applications in Tyrode's solution or Tyrode's containing Suramin (100 µM) or 0 Ca<sup>2+</sup>/EGTA (2 mM). **(b1)** Sample record of a 3T3 cell before, during, and after 100 µM ATP challenge. **(b2)** Average currents within the 10 s period of 3T3 cells before, during, and after 100 µM ATP challenge (n = 11 replicates; *p* > 0.05).



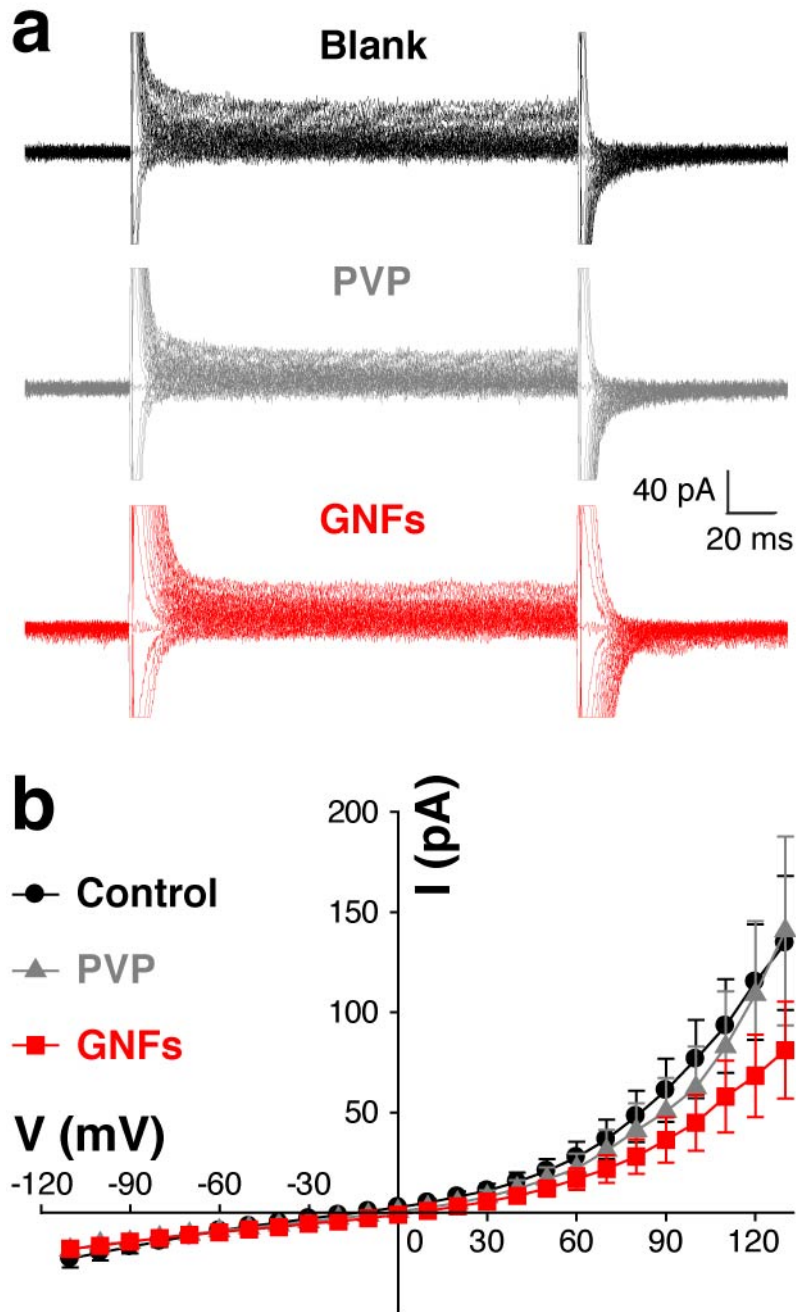

**Figure S7. Acute application of GNFs does not alter current-voltage characteristics in 3T3 cells. (a)** Trace overlays for a 3T3 cell in Tyrode or Tyrode containing either PVP or GNFs. **(b)** Average I-V curves of the same 3T3 cells subjected to three treatments (n = 5 replicates;  $p > 0.05$ ).

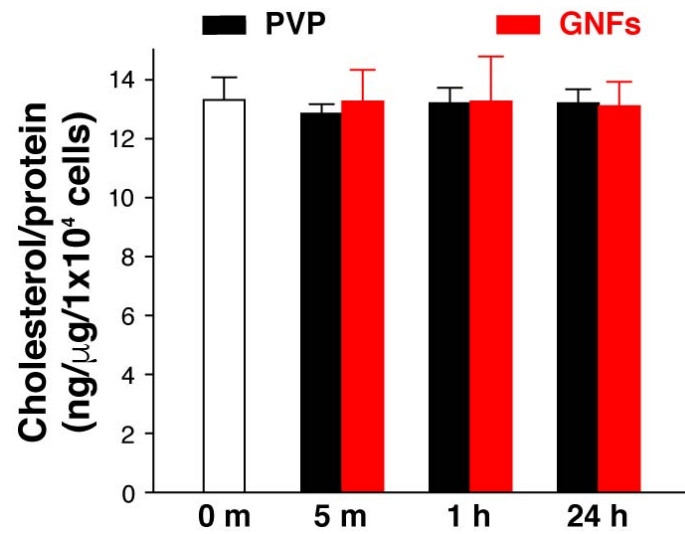

**Figure S8. GNFs do not change total cellular cholesterol.** Total cellular cholesterol quantifications by gas chromatography coupled with a flame ionization detector after specified periods of incubation with PVP or GNFs (all  $n = 6$  replicates; all  $p > 0.05$ ).

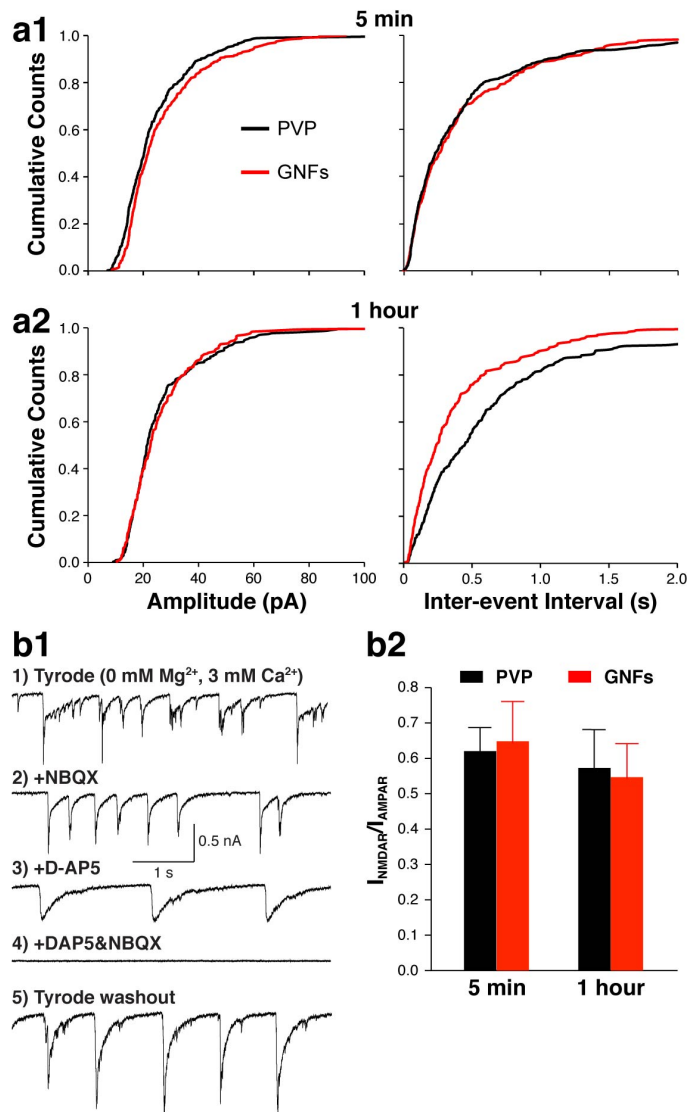

**Figure S9. Acute treatment with GNFs has minimal postsynaptic effect on neurons. (a)** Cumulative distributions of mEPSC amplitudes and frequencies in neurons treated with PVP or GNFs for 5 min or 1 h (5 min,  $n_{\text{PVP}} = 8$  replicates,  $n_{\text{graphene}} = 8$  replicates, 1 h,  $n_{\text{PVP}} = 6$  replicates,  $n_{\text{graphene}} = 6$  replicates;  $p < 0.01$  between 1-hour PVP and GNF treatment,  $p > 0.05$  for all other conditions). **(b1)** Sequential recording of AMPA and NMDA receptor currents from the same neurons. **(b2)** NMDAR and AMPAR current ratio in PVP or GNFs treated neurons (5 min,  $n_{\text{PVP}} = 11$  replicates,  $n_{\text{graphene}} = 12$  replicates, 1 h,  $n_{\text{PVP}} = 10$  replicates,  $n_{\text{graphene}} = 9$  replicates; all  $p > 0.05$ ).

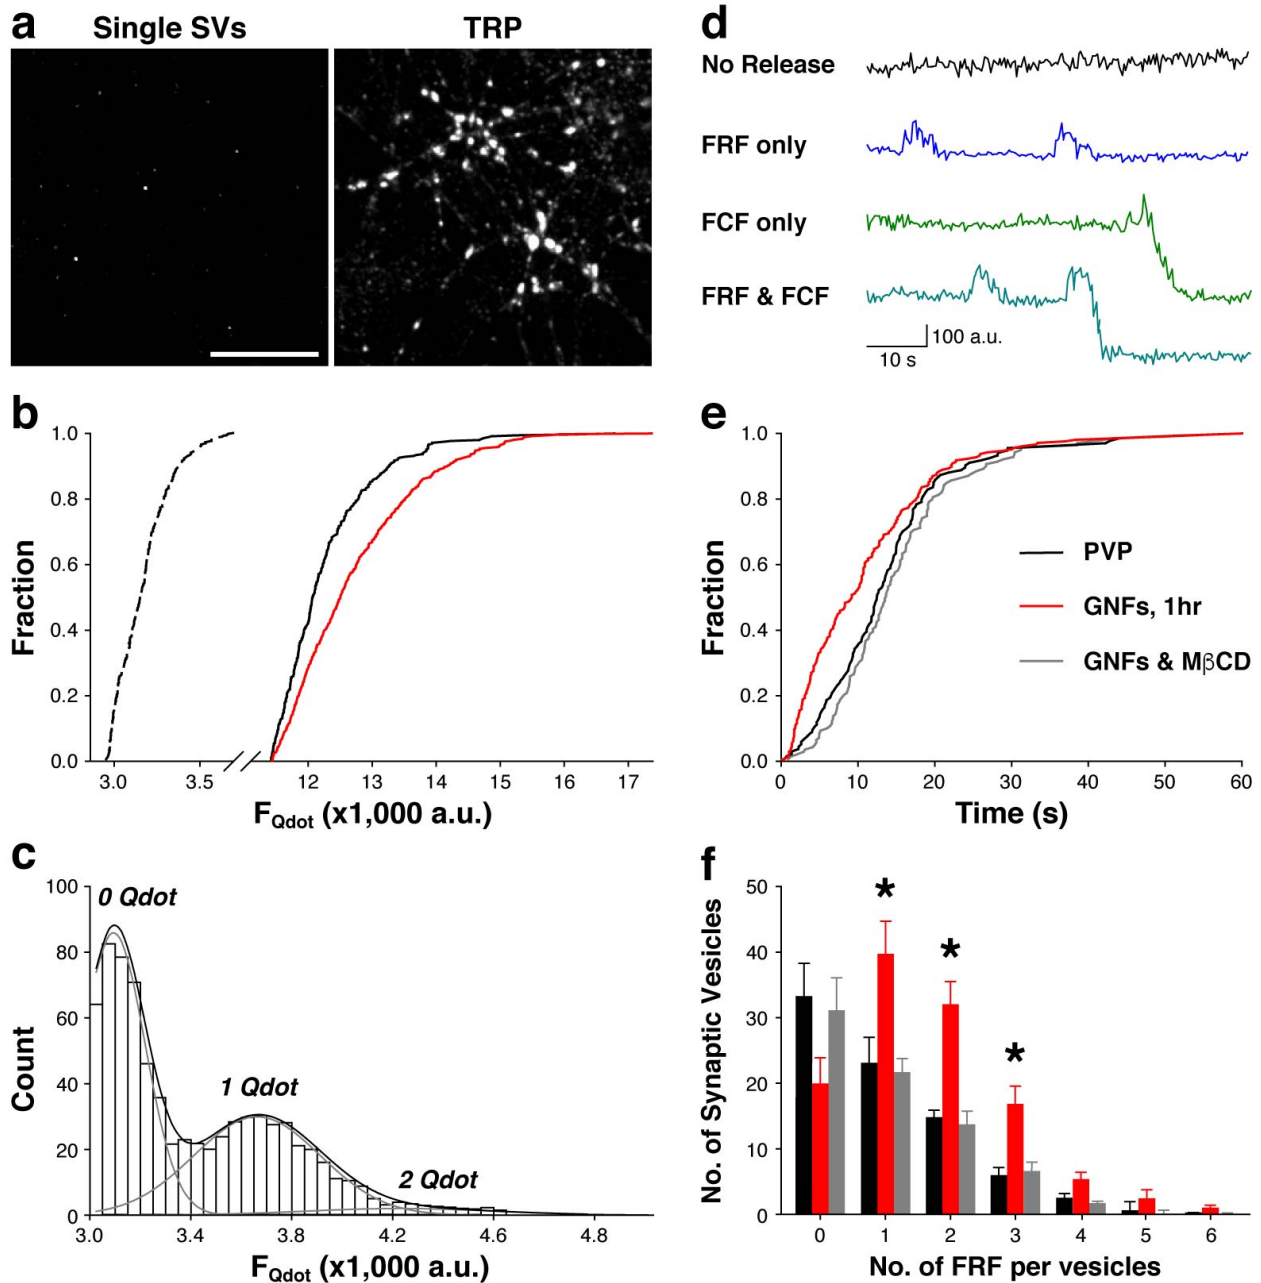

**Figure S10. Single Qdot imaging reports single vesicle fusion kinetics.** TRP, total releasable pool, FRF, fast and reversible fusion, FCF, full collapse fusion. (a) Sample images of single synaptic vesicle loading for releasable pool (0.8 nM Qdot) or TRP loading (100 nM Qdot). (b) Synaptic Qdot photoluminescence intensities from single vesicle and TRP loading were measured with the same settings and plotted on the same scale. The background intensity was  $2,784 \pm 96$

a.u. and the detection threshold was set at 2,900 a.u.. Under single vesicle loading, the mean Qdot photoluminescence intensity was  $402 \pm 43$  a.u.. Under total recycling pool loading, the mean Qdot photoluminescence intensities were  $8,913 \pm 144$  a.u. for neurons treated with PVP and  $9,980 \pm 185$  a.u. for neurons treated with graphene, which is significantly higher ( $p < 0.05$ ). Based on these intensity values, we estimated that the average numbers of total recycling vesicles are 23.4 for neurons on glass and 26.2 for those on graphene. (c) The distribution of mean Qdot photoluminescence in individual synaptic boutons defined by retrospective FM4-64 staining. Quantal analysis (black and gray lines) indicates that the mean photoluminescence intensity of loaded single Qdots was  $388 \pm 71$  a.u. after background subtraction. (d) Sample photoluminescence traces of single Qdots for four different types of synaptic vesicle release behaviors. (e) Synaptic vesicle release probability (measured as the first fusion event of Qdot-loaded synaptic vesicles) in neurons treated with PVP, GNFs or GNFs & M $\beta$ CD (GNFs 1 hr,  $p < 0.05$ ). (f) Distribution of individual synaptic vesicles conducting different rounds of FRF.  $*p < 0.05$ . Error bars represent the S.E.M.

## References

- 1 Wajid, A. S. *et al.* Polymer-stabilized graphene dispersions at high concentrations in organic solvents for composite production. *Carbon* **50**, 526-534, doi:<http://dx.doi.org/10.1016/j.carbon.2011.09.008> (2012).
- 2 Hernandez, Y. *et al.* High-yield production of graphene by liquid-phase exfoliation of graphite. *Nat Nanotechnol* **3**, 563-568, doi:10.1038/nnano.2008.215 (2008).
- 3 O'Connell, M. J. *et al.* Band gap fluorescence from individual single-walled carbon nanotubes. *Science* **297**, 593-596, doi:10.1126/science.1072631297/5581/593 [pii] (2002).
- 4 Liu, G. & Tsien, R. W. Synaptic transmission at single visualized hippocampal boutons. *Neuropharmacology* **34**, 1407-1421 (1995).
- 5 Amundson, D. M. & Zhou, M. Fluorometric method for the enzymatic determination of cholesterol. *Journal of biochemical and biophysical methods* **38**, 43-52 (1999).
- 6 Bird, D. K. *et al.* Metabolic mapping of MCF10A human breast cells via multiphoton fluorescence lifetime imaging of the coenzyme NADH. *Cancer Res* **65**, 8766-8773, doi:10.1158/0008-5472.can-04-3922 (2005).
- 7 Digman, M. A., Caiolfa, V. R., Zamai, M. & Gratton, E. The phasor approach to fluorescence lifetime imaging analysis. *Biophys J* **94**, L14-16, doi:10.1529/biophysj.107.120154 (2008).
- 8 Stefl, M., James, N. G., Ross, J. A. & Jameson, D. M. Applications of phasors to in vitro time-resolved fluorescence measurements. *Anal Biochem* **410**, 62-69, doi:10.1016/j.ab.2010.11.010 (2011).
- 9 Sezgin, E. *et al.* Elucidating membrane structure and protein behavior using giant plasma membrane vesicles. *Nat. Protocols* **7**, 1042-1051, doi:<http://www.nature.com/nprot/journal/v7/n6/abs/nprot.2012.059.html - supplementary-information> (2012).
- 10 Kim, H. M. *et al.* A two-photon fluorescent probe for lipid raft imaging: C-laurdan. *Chembiochem* **8**, 553-559, doi:10.1002/cbic.200700003 (2007).
- 11 Hansen, J. S. & Helix-Nielsen, C. An epifluorescence microscopy method for generalized polarization imaging. *Biochem Biophys Res Commun* **415**, 686-690, doi:10.1016/j.bbrc.2011.10.138 (2011).
- 12 Zhang, Q., Li, Y. & Tsien, R. W. The Dynamic Control of Kiss-And-Run and Vesicular Reuse Probed with Single Nanoparticles. *Science* **323**, 1448-1453 (2009).
- 13 Bradley, J., Luo, R., Otis, T. S. & DiGregorio, D. A. Submillisecond Optical Reporting of Membrane Potential In Situ Using a Neuronal Tracer Dye. *Journal of Neuroscience* **29**, 9197-9209, doi:10.1523/jneurosci.1240-09.2009 (2009).
- 14 Harden, T. K., Boyer, J. L. & Nicholas, R. A. P2-purinergic receptors: subtype-associated signaling responses and structure. *Annu Rev Pharmacol Toxicol* **35**, 541-579, doi:10.1146/annurev.pa.35.040195.002545 (1995).
- 15 Burnstock, G. Purinergic signalling and disorders of the central nervous system. *Nat Rev Drug Discov* **7**, 575-590, doi:10.1038/nrd2605 (2008).
- 16 Parekh, A. B. Store-operated CRAC channels: function in health and disease. *Nat Rev Drug Discov* **9**, 399-410, doi:10.1038/nrd3136 (2010).
